# Supplementary material
Source: PubMed Central journal article supplement (PMC7556129)
Supplement: advancesADV2020002271-suppl1.pdf [file advancesADV2020002271-suppl1.pdf]

## Supplemental data

### **Control cohort of PV/ET without leukemic transformation**

Eighty ET or PV patients who did not transform to acute leukemia with at least 8 years of follow-up were recruited in 2 centers (CHU Angers and Institut Paoli-Calmettes Marseilles). Furthermore, these patients did not present any events - myelofibrosis or myelodysplastic evolution or death - during the follow-up. A sample at the chronic phase was analyzed by NGS: diagnosis in 52/80 cases and during the follow-up in 28/80 cases. NGS data were already available for patients from IPC Marseilles and were comparable to data from Angers with both a similar panel and technology (Haloplex, Agilent®). The control cohort was constituted of 37 PV (all with *JAK2V617F* mutations) and 43 ET (driver mutations were 21 *JAK2V617F*, 15 *CALR*, 1 *MPLW515* and 6 triple negatives). Characteristics and results of the genomic analysis of patients of the control cohort were summarized in the Supplemental Table SVI.

### **NGS analysis and bioinformatic pipeline**

Libraries were made using HaloplexHS technology, according to manufacturer recommendation. The workflow consists of a digestion and a denaturation of the sample DNA, an hybridization of the probe library to the DNA targets, a ligation and capture of uniquely barcoded targets, and an amplification of the enriched fragments by PCR. These libraries are pooled, then clusters are created and sequenced with an Illumina SBS chemistry on a NextSeq500 (Illumina, San Diego, CA, USA). The family reads used for demultiplexing allow a good sensitivity for mutation with low variant allele frequency (VAF) by removing sequencing errors. Sequence alignment and variant calling were performed with SureCall software (Agilent Technology®) using GenAligners 3.0 tool (Agilent Technology®) with the default settings and SNPPEP (Agilent Technology®). Customized parameters were applied on this bayesian based model as follow: minimum allele frequency = 0.02, minimum quality of base = 30, minimum mutated reads = 4, variant threshold = 0.3. We used Integrative Genomics Viewer (IGV, Cambridge, UK) to visualize the read alignment, allowing us to confirm the variant calls. wAnnoVar (Yang & Wang, 2015) annotated the variants, confronting the rare ones with COSMIC database and SNPs databases (gnomAD, dbSNP, ExAC, 1000 Genomes, GO-ESP, and TOPMED). We considered nonsynonymous coding variants when Variant Allele Frequency (VAF) was higher than 2%, and coverage of called regions reached 50. Known polymorphisms in 1000 Genomes, gnomAD, and Exac databases were excluded when the minor allele frequency was higher than 1%. Polymorphism Phenotyping (PolyPhen2) and Sorting Intolerant From Tolerant (SIFT) tools gave us the

functional prediction of mutations. Mutations were then classified according to their putative pathogenic effect in three classes described in Table SI.

We evaluated the diagnosis performance of our method by analyzing several samples with known mutations, and by participating since 2016 to the bi-annual control of quality of the French Group of molecular Biology in hematology (GBMHM).

### **NGS quality and complementary analysis**

Sample specific-barcodes primers were used to index PCR products. We used molecular barcodes specific to each DNA fragment of interest, allowing us to obtain a median of 60.8% of duplicate amplicons. The median coverage of NGS was 585X [129; 1671]. The median percentage of uncovered areas was 2.6% [1.1%; 21.7%], which give evidence of a satisfactory average coverage for each sample analyzed.

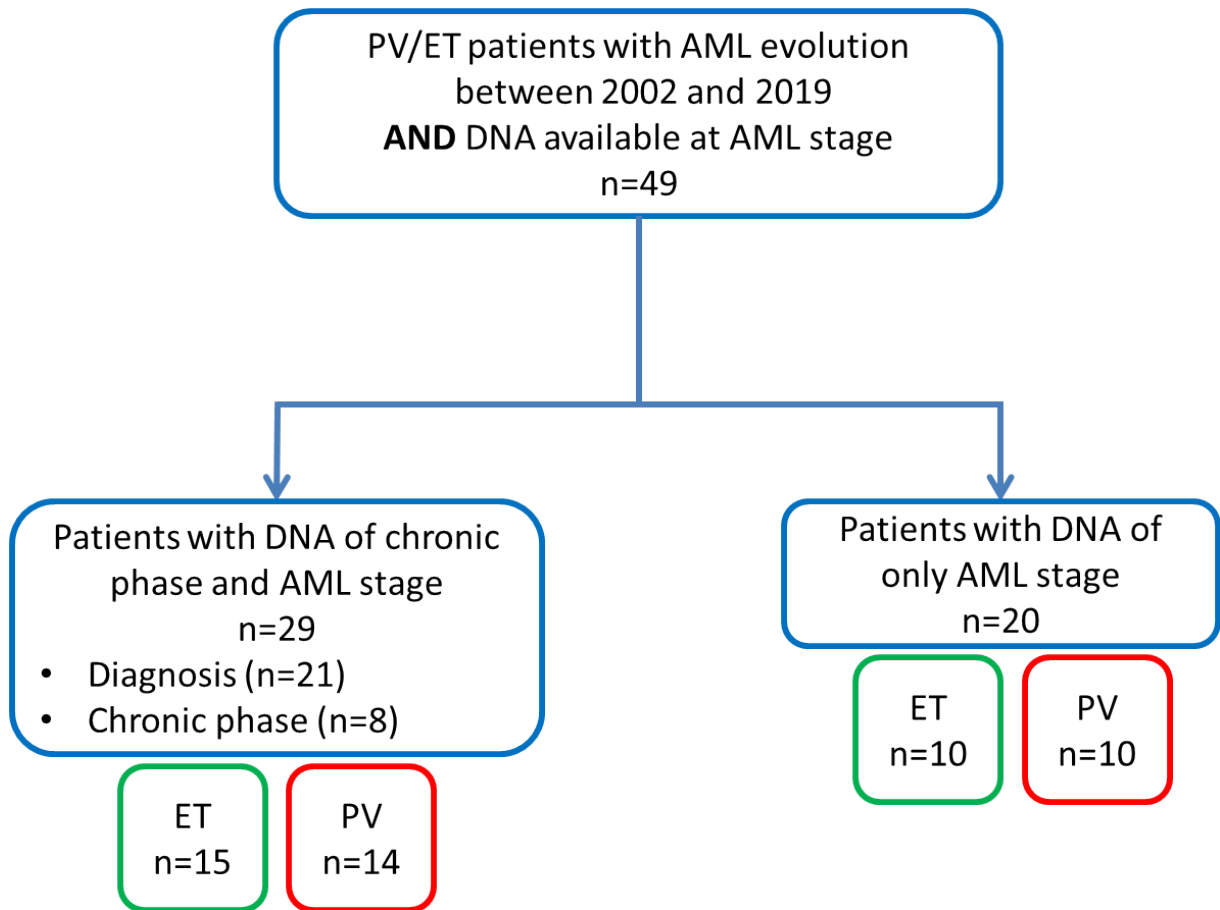

**Figure S1:** Flow chart description of the cohort

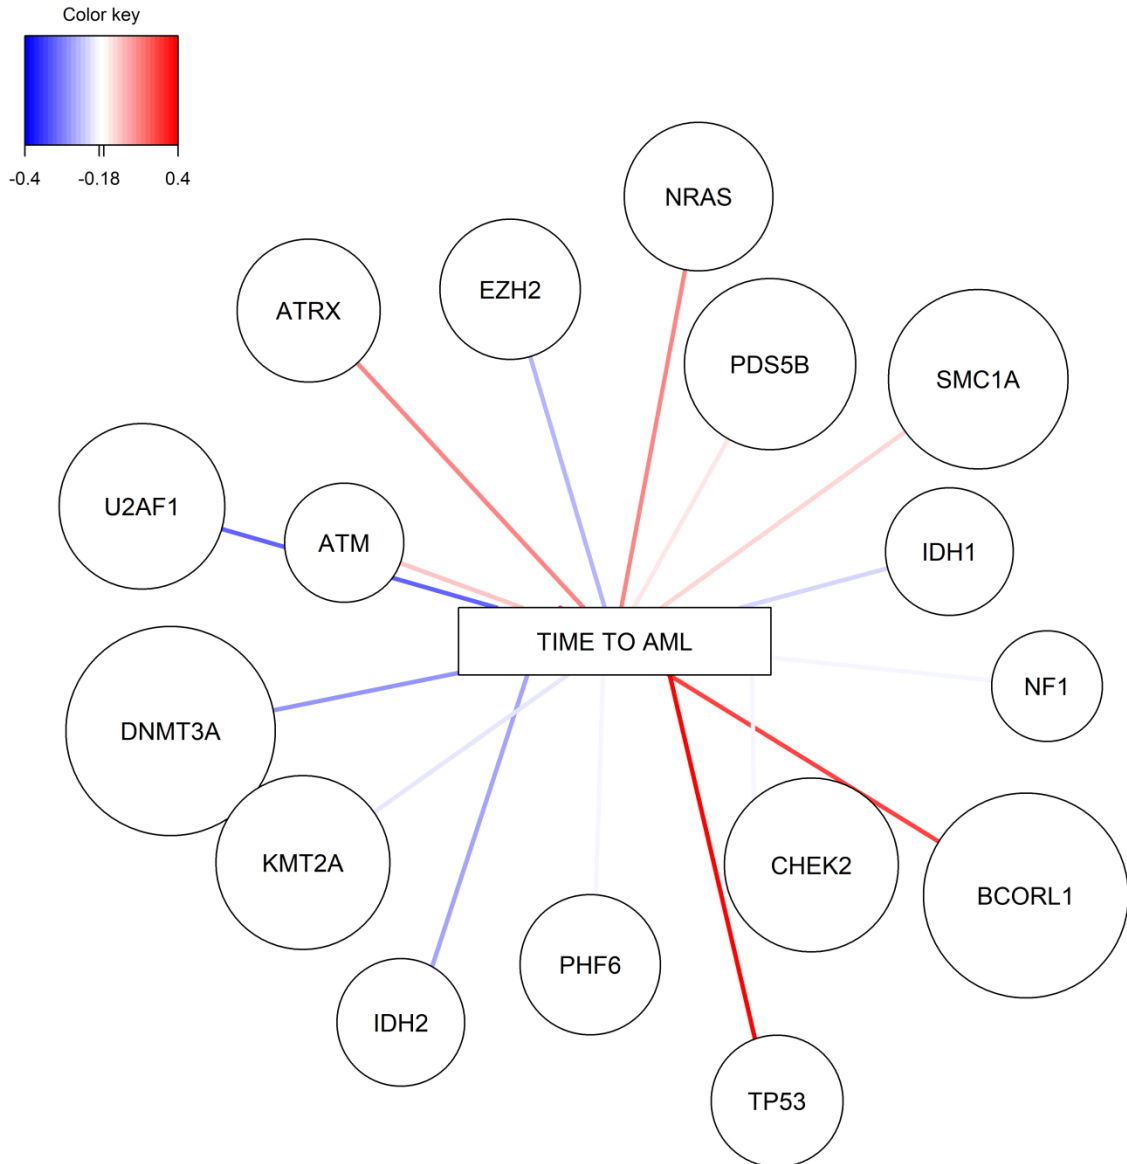

**Figure S2:** Network of mutated genes associated with the interval of leukemic transformation

Result from the first axis of the sPLS analysis. Genes with a correlation coefficient above 0.18 were represented. The color indicates the correlation between mutations and the time to leukemic transformation. Red color indicates a positive correlation (i.e. a later transformation) whereas blue color indicates a negative correlation (i.e. an early transformation). The size of the circles is arbitrary. All additional mutations were retained.

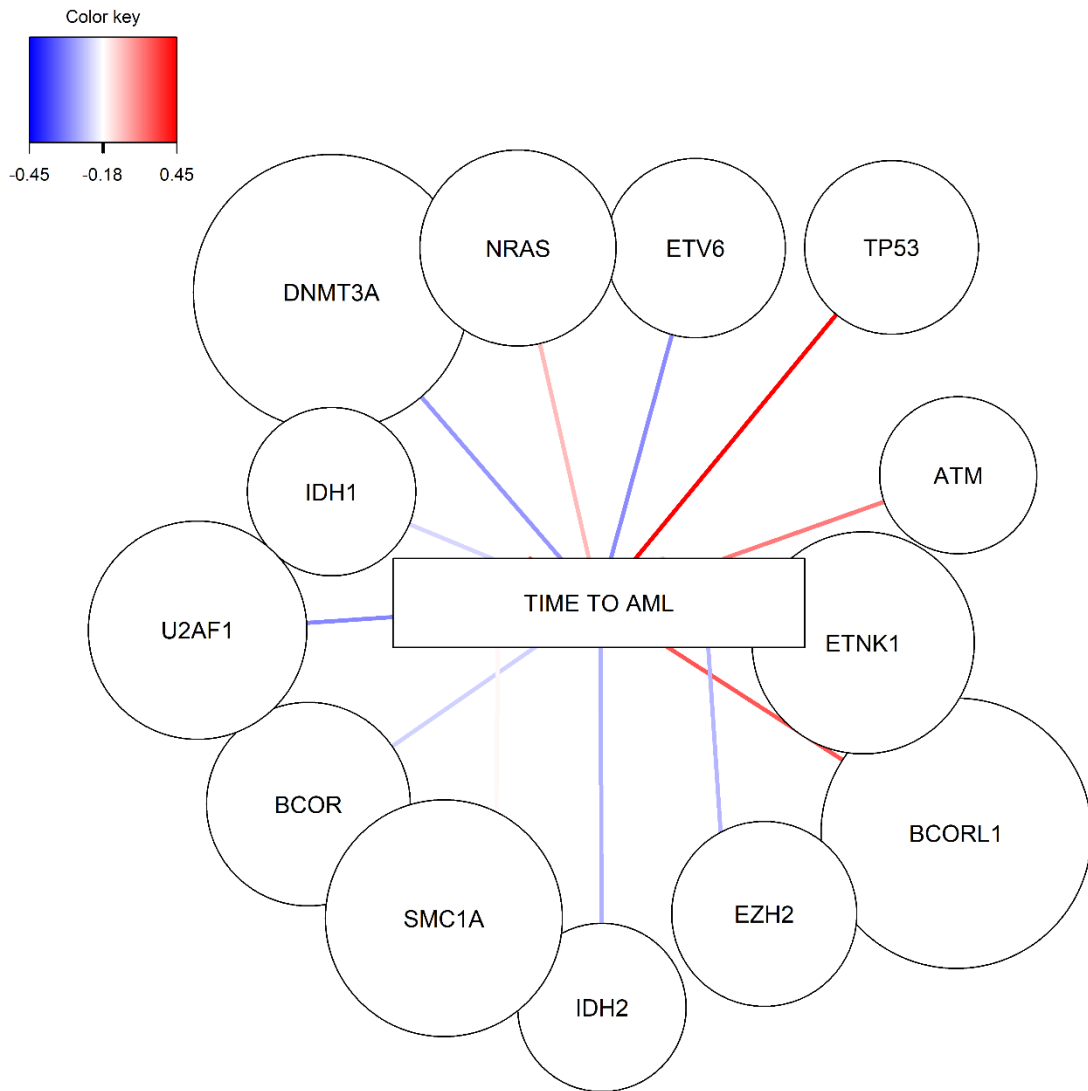

**Figure S3:** Sensitivity analysis with only deleterious and probably deleterious mutations for the network of mutated genes associated with the interval of leukemic transformation

Result from the first axis of the sPLS analysis. Genes with a correlation coefficient above 0.18 were represented. The color indicates the correlation between mutations and the time to leukemic transformation. Red color indicates a positive correlation (i.e. a later transformation) whereas blue color indicates a negative correlation (i.e. an early transformation). The size of the circles is arbitrary. Only deleterious and probably deleterious mutations were retained.

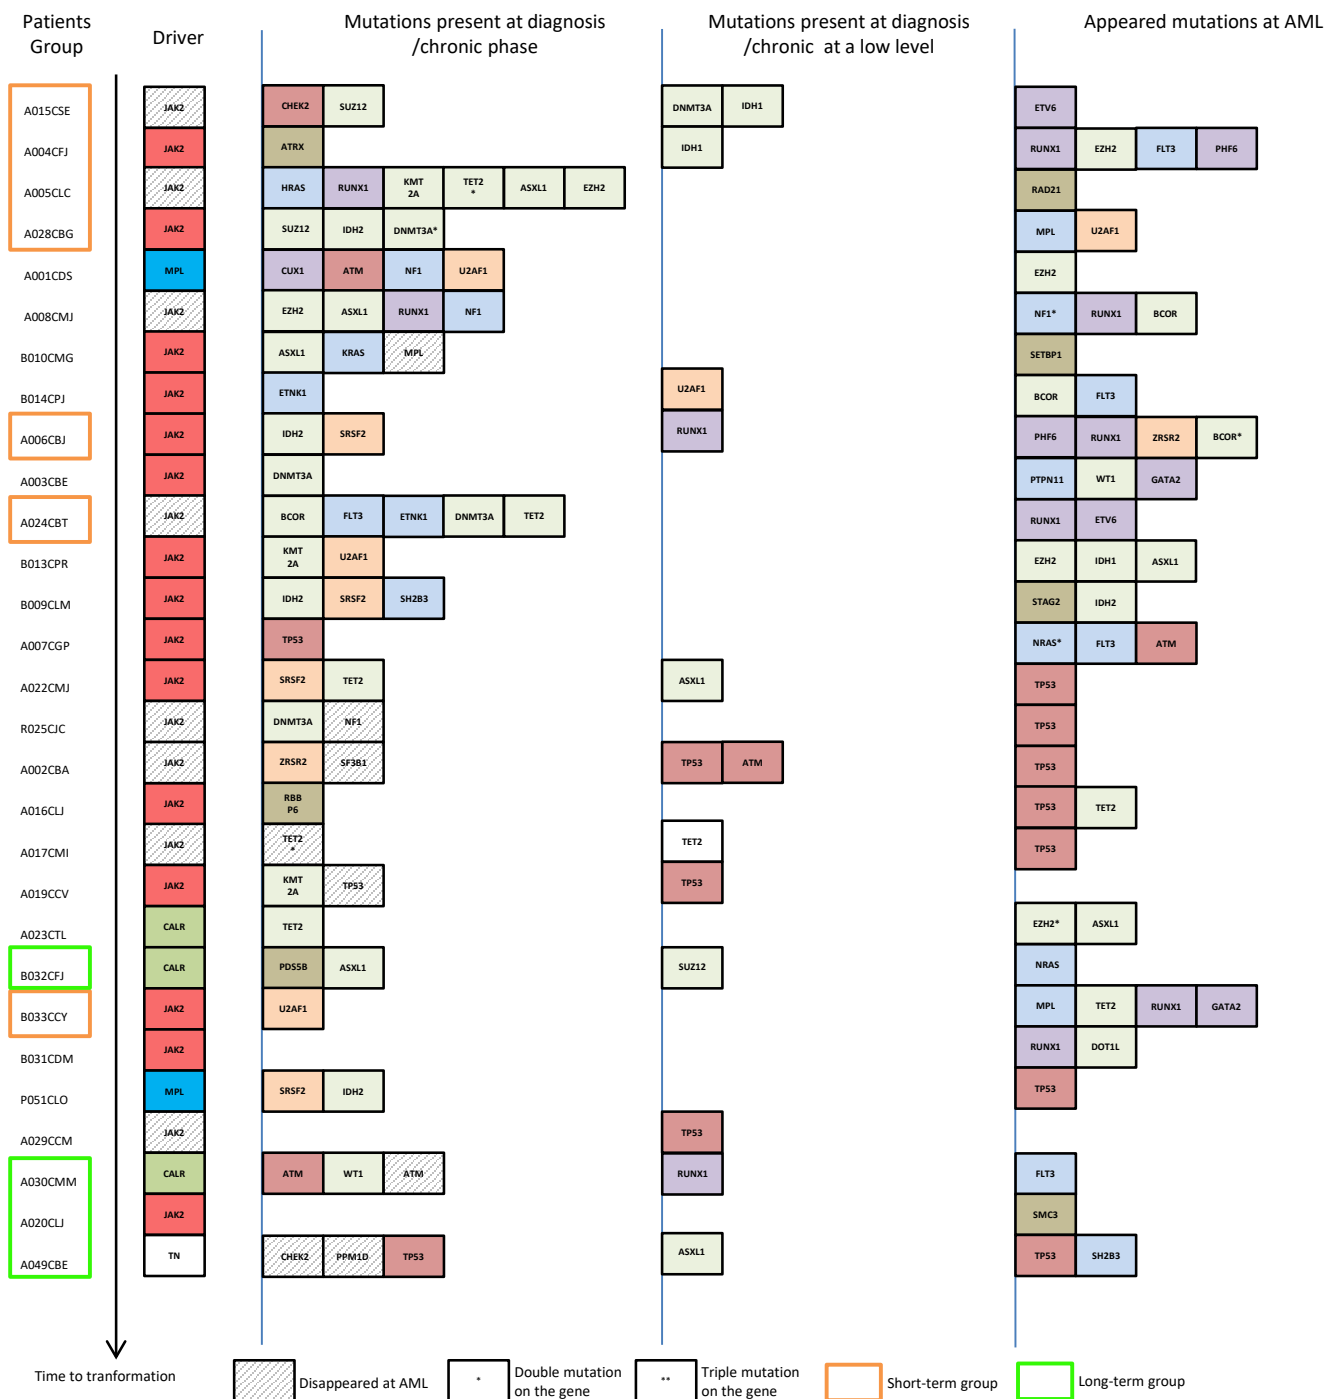

**Figure S4:** Mutations landscape of leukemic transformation and matched diagnosis/chronic phase

Rows represented patients ordered according to time to leukemic progression. Driver mutations were represented in the first column. Additional mutations were classified into 3 columns for (i) mutation already present at the diagnosis/chronic phase, (ii) mutation present at the diagnosis/chronic phase but not detected and (iii) mutations that appeared at leukemic transformation. Each box represented a mutation and the color were attributed to gene's functions (epigenetic=green, cycle cell=red, splicing=orange, signaling=blue and transcription factors=purple). TN: triple negative.

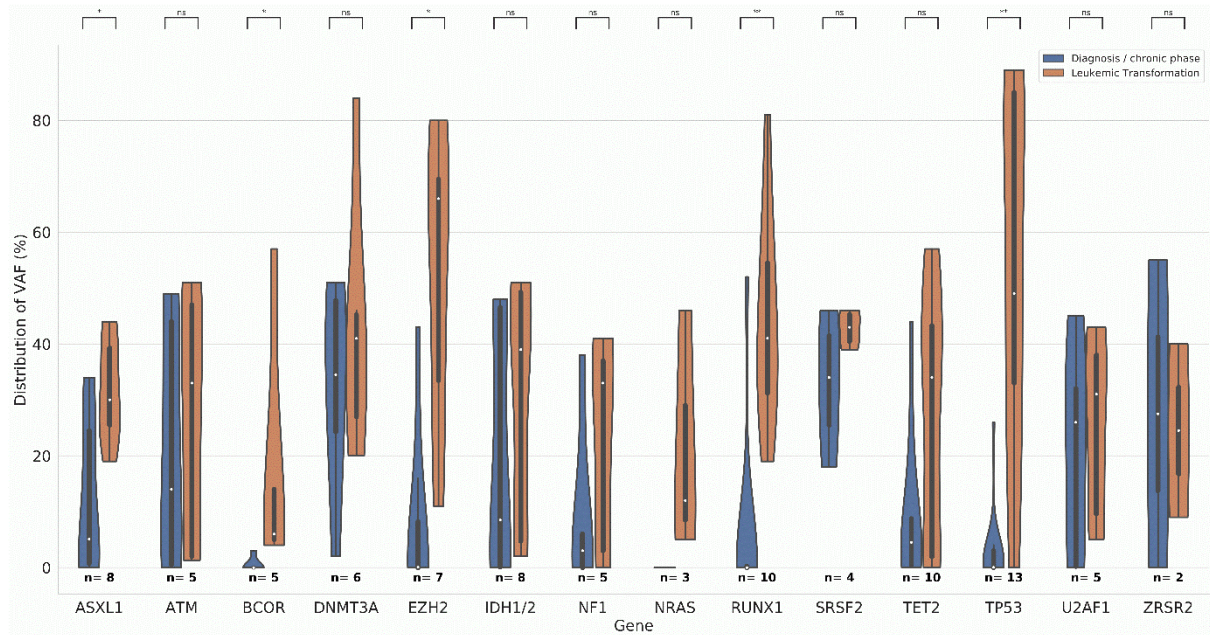

**Figure S5:** Allele burden comparison of matched diagnosis/chronic phases and leukemic transformations

Violin plots displaying the allele burden distribution of additional mutations at the diagnosis/chronic phase (blue) and at the time of leukemic transformation (orange). These evolutions were tested by paired Wilcoxon tests (ns: non significant, \*:  $p < 0.01$ , \*\*:  $p < 0.001$ )

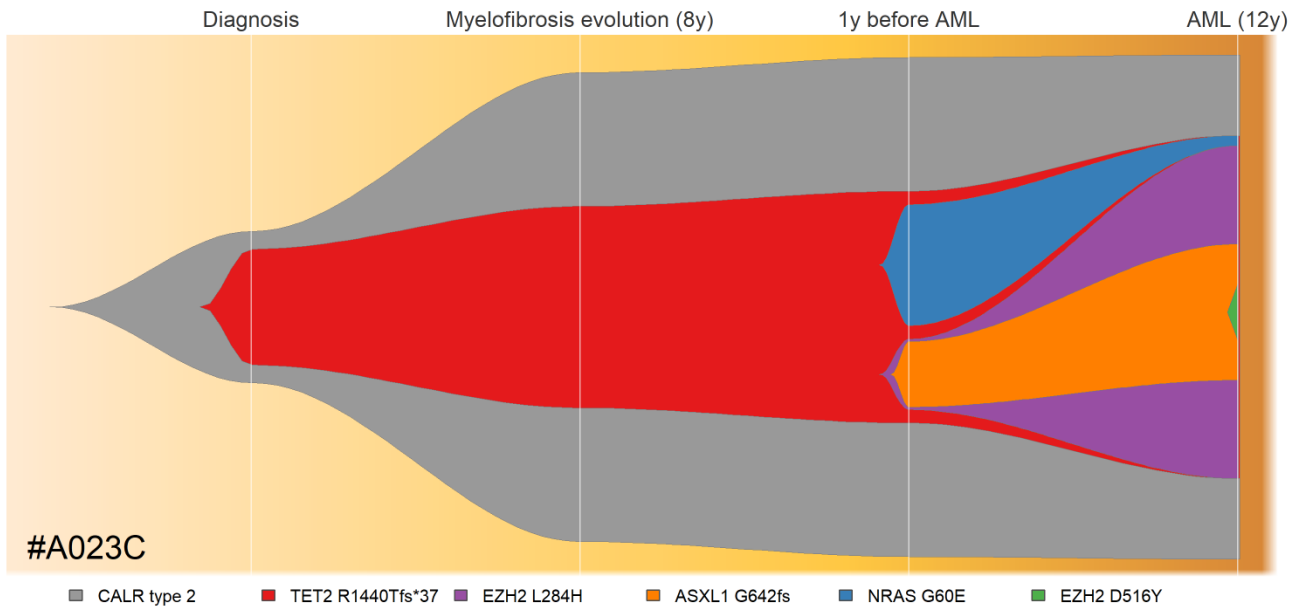

**Figure S6:** Plotfish showing clonal evolution inferred from NGS sequencing of 4 iterative samples

AML: Acute Myeloid Leukemia, y: years of follow-up



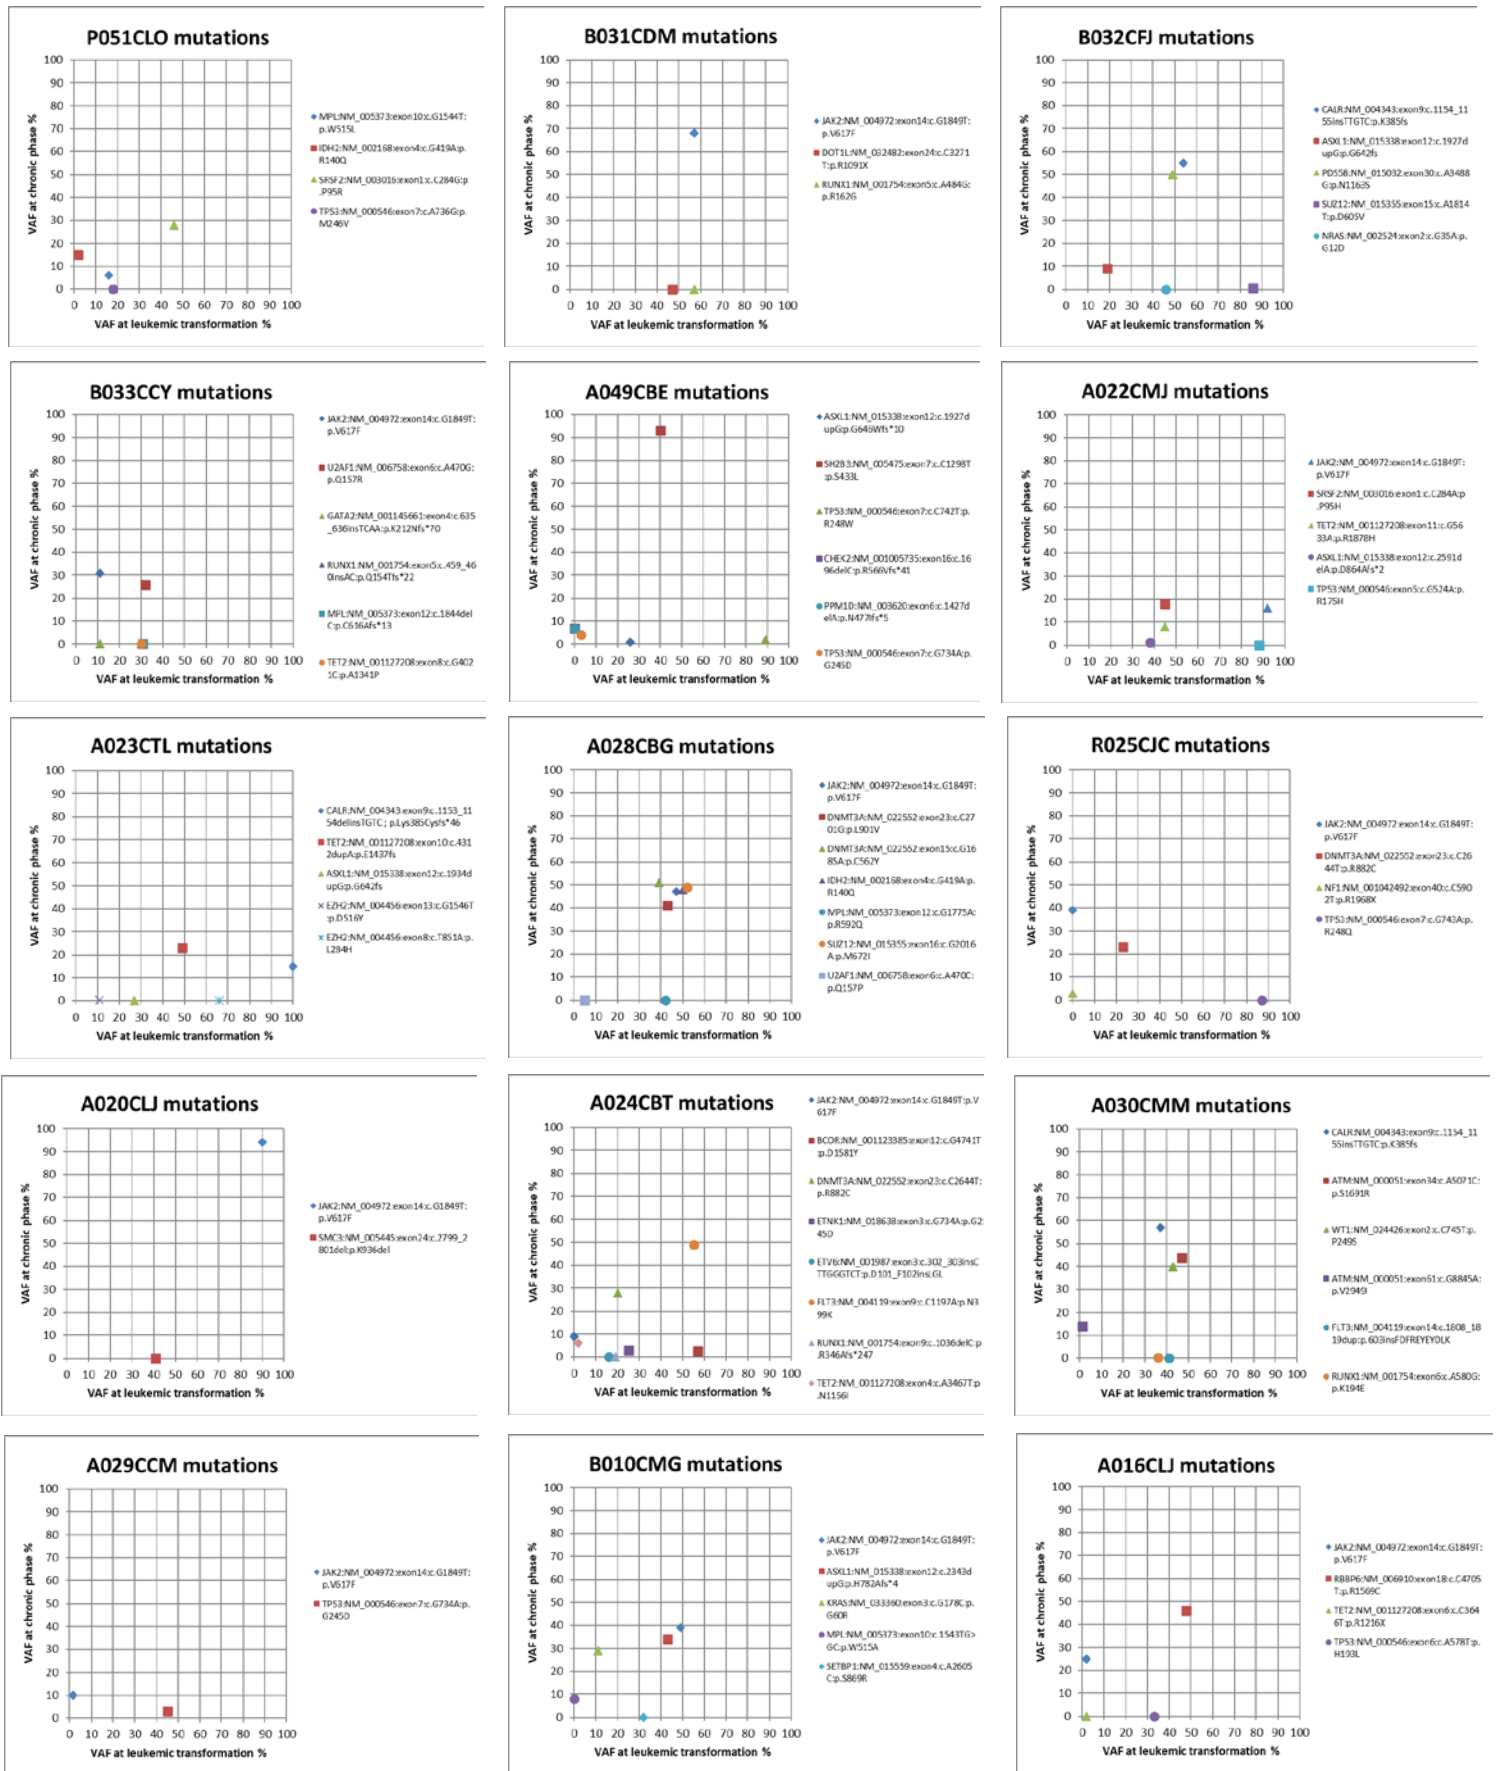

**Figure S7:** Allele burden evolution of mutations between chronic phase and leukemic transformation (part 1)

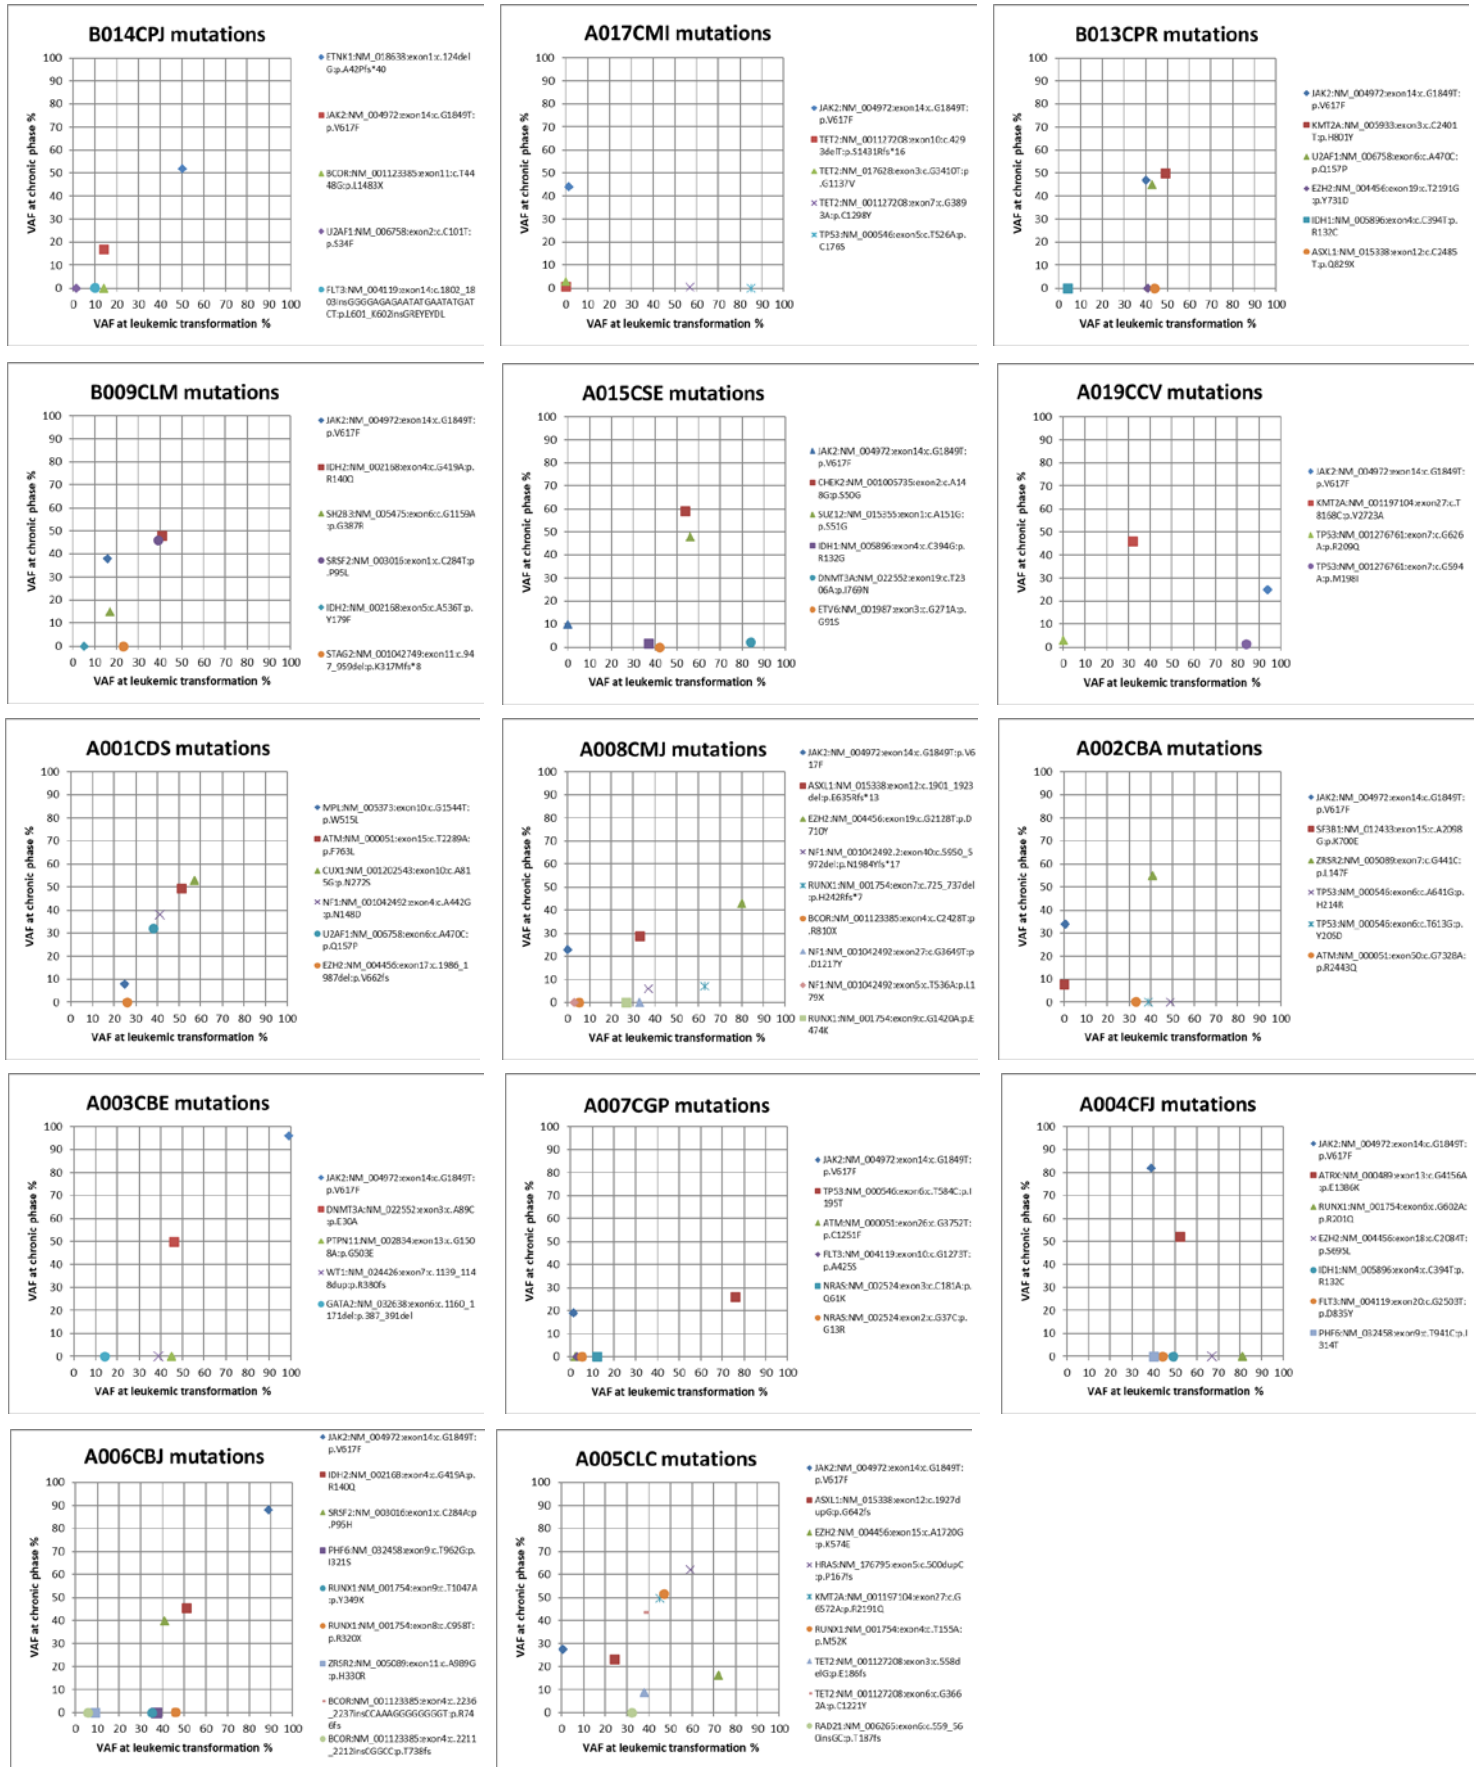

**Figure S7: Allele burden evolution of mutations between chronic phase and leukemic transformation (part 2)**

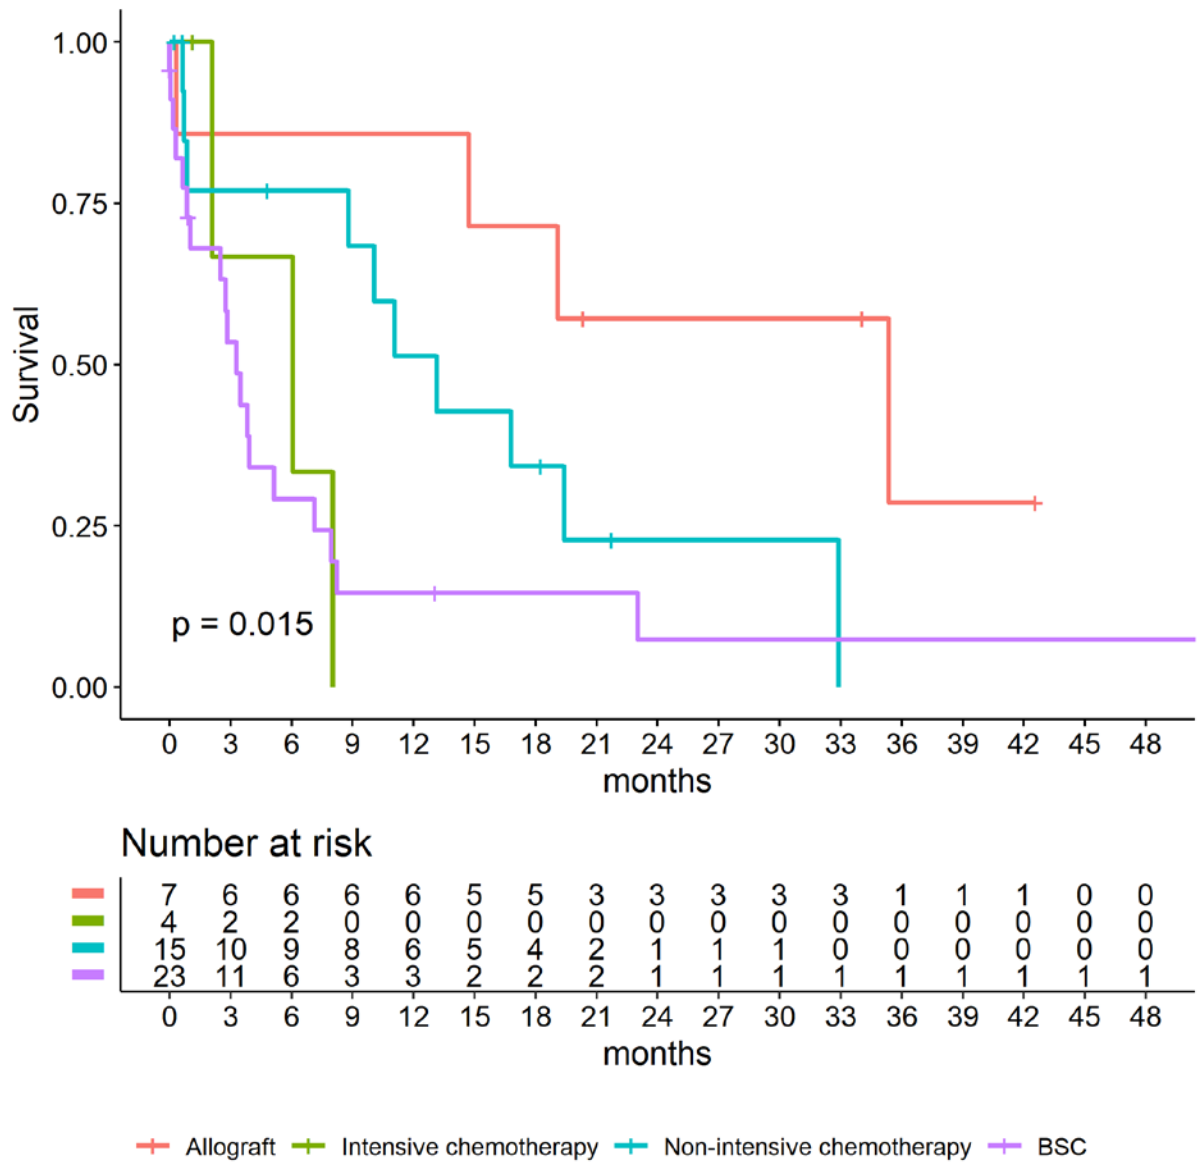

**Figure S8:** Overall Survival of leukemic transformation according to treatment

BSC: Best Supportive Care.

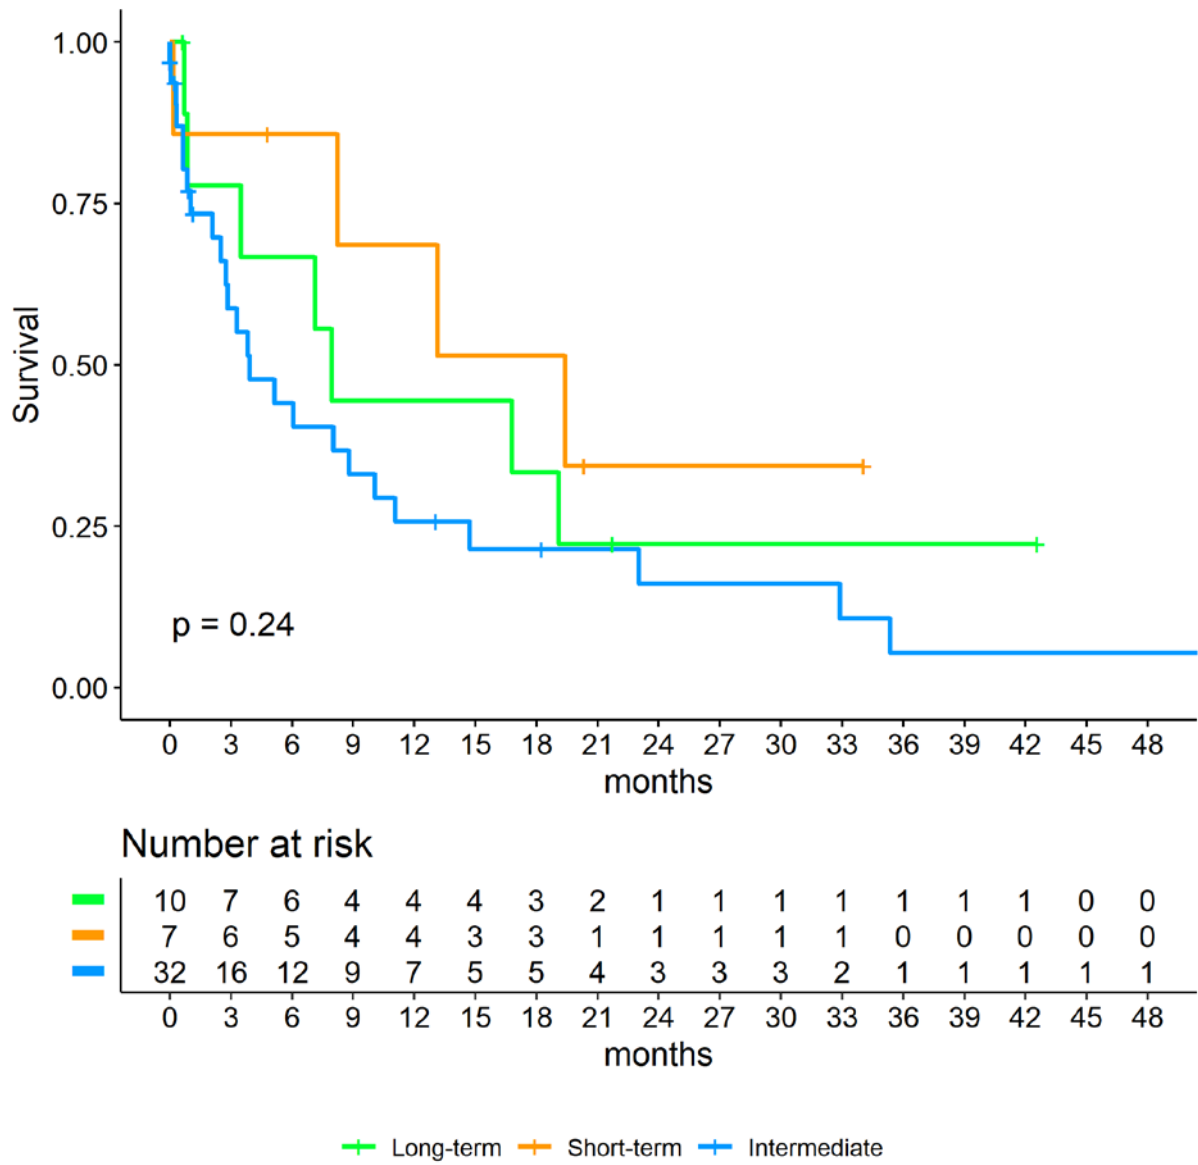

**Figure S9:** Overall Survival of leukemic transformation according to the groups of time to transformation

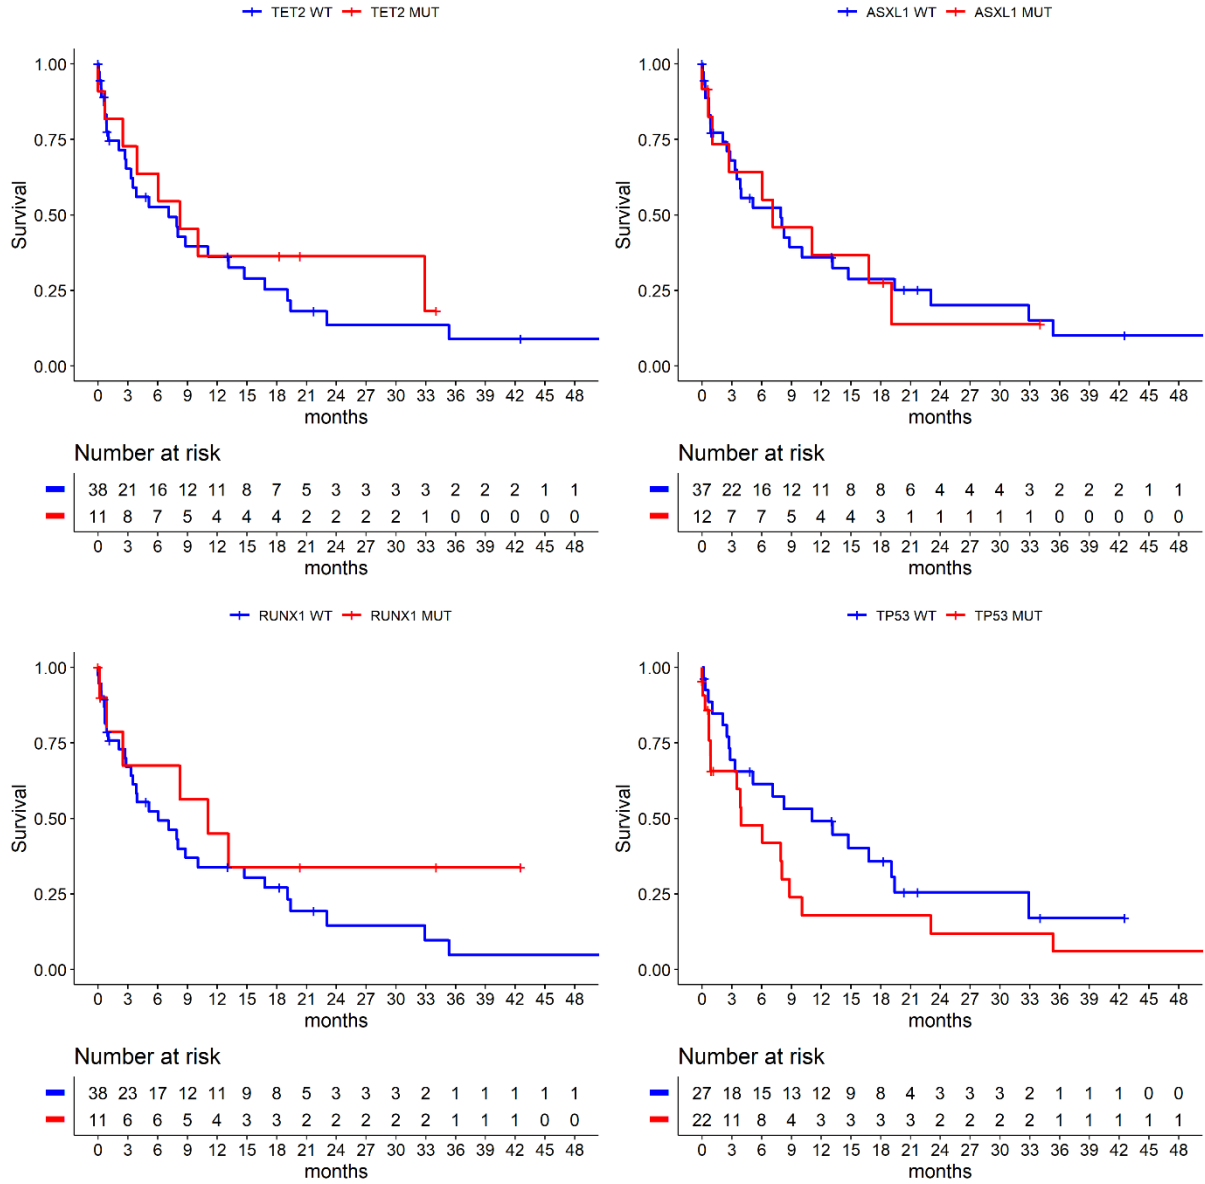

**Figure S10:** Overall Survival of leukemic transformation according to the presence of additional mutations in *TET2*, *ASXL1*, *RUNX1* or *TP53*

No pipobroman (n=33)

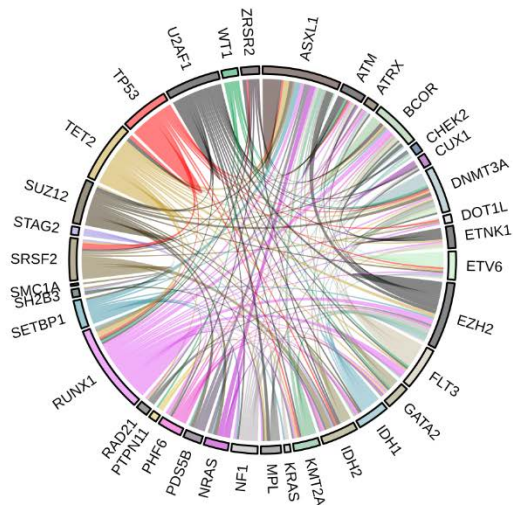

Pipobroman (n=16)

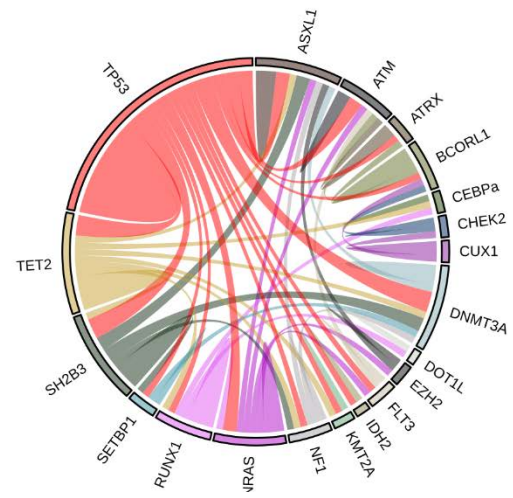

**Figure S11:** Circos plots representing the mutational landscape of leukemic transformation of patient not treated or treated (i.e. at least 12 months) by pipobroman during chronic phase

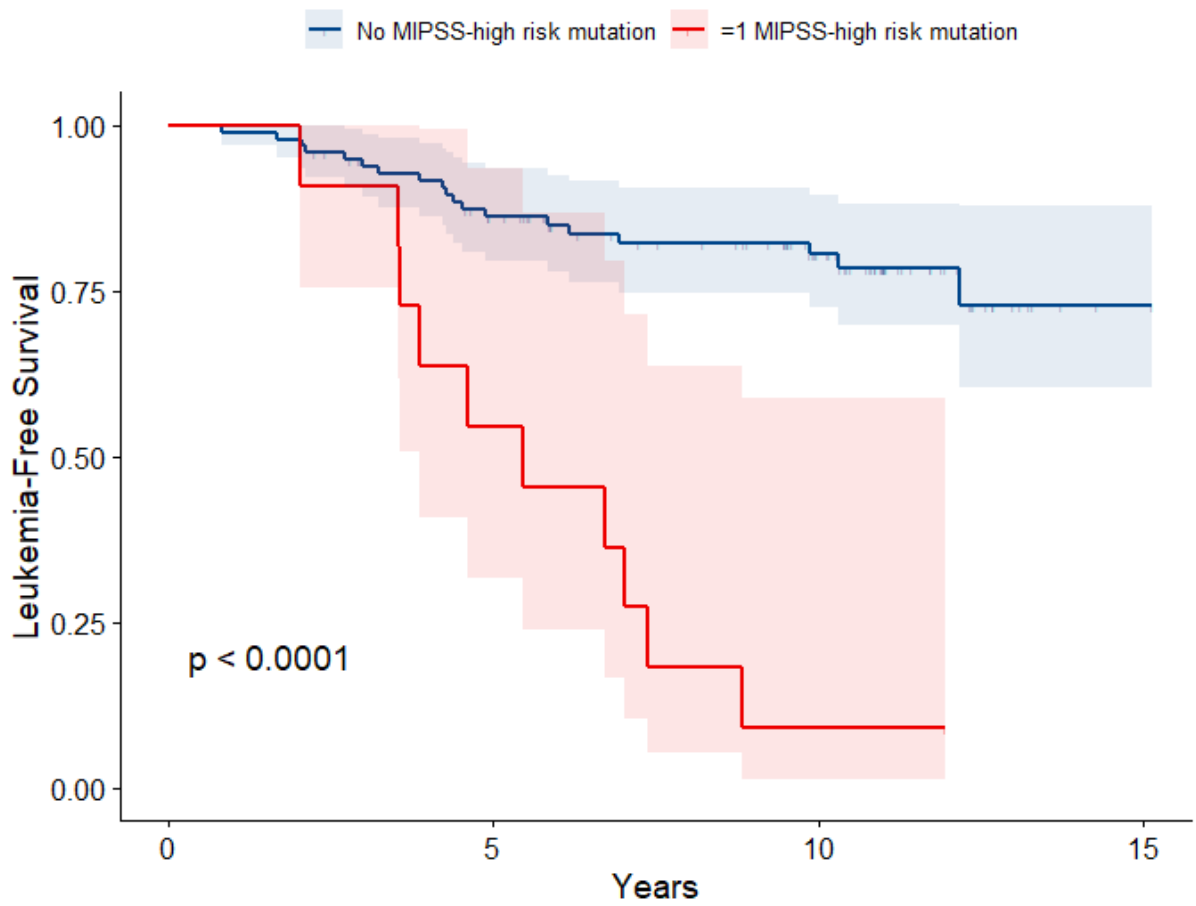

**Figure S12:** Leukemia-free survival of patients at the chronic phase after according to the presence of at least one MIPSS-PV/ET high-risk mutation

**Table SI:** Variant classification according to the presumed impact of mutation on protein function

| Type     | Signification                       | Criteria                                                                                                                         |
|----------|-------------------------------------|----------------------------------------------------------------------------------------------------------------------------------|
| <b>A</b> | <b>Deleterious</b>                  | deleterious variant described in myeloid neoplasms in COSMIC and validated somatic                                               |
|          |                                     | undescribed variant causing a truncated protein                                                                                  |
| <b>B</b> | <b>Probably deleterious</b>         | variant described in myeloid neoplasms in COSMIC but not validated somatic, absent from the "SNP" bases or with MAF <0.01 (1%)   |
|          |                                     | variant not described in myeloid neoplasms in COSMIC, with MAF <0.01 (1%) and described as deleterious by Polyphen and / or SIFT |
| <b>C</b> | <b>Of undetermined significance</b> | variant not described in myeloid neoplasms in COSMIC, with MAF <0.01 (1%) without impact predicted by Polyphen and SIFT          |

MAF: minor allele frequency; SNP: single-nucleotide polymorphism



**Table SII:** Allele burden of driver mutation at the chronic phase and at the leukemic transformation

| Patient | Disease | Driver | Mutation         | VAF at chronic phase (%) | VAF at leukemia (%) |
|---------|---------|--------|------------------|--------------------------|---------------------|
| A023CTL | ET      | CALR   | p.Lys385Cysfs*46 | 15                       | 100                 |
| A030CMM | ET      | CALR   | p.Lys385Cysfs*46 | 57                       | 37                  |
| B032CFJ | ET      | CALR   | p.Lys385Cysfs*46 | 55                       | 54                  |
| A002CBA | ET      | JAK2   | p.V617F          | 34                       | 0,57                |
| A005CLC | ET      | JAK2   | p.V617F          | 27                       | 98                  |
| A007CGP | ET      | JAK2   | p.V617F          | 19                       | 38                  |
| A015CSE | ET      | JAK2   | p.V617F          | 10                       | 0,5                 |
| A016CLJ | ET      | JAK2   | p.V617F          | 25                       | 9                   |
| A019CCV | ET      | JAK2   | p.V617F          | 25                       | 1,4                 |
| A022CMJ | ET      | JAK2   | p.V617F          | 16                       | 0                   |
| A024CBT | ET      | JAK2   | p.V617F          | 9                        | 0                   |
| B013CPR | ET      | JAK2   | p.V617F          | 47                       | 2                   |
| A001CDS | ET      | MPL    | p.W515L          | 8                        | 27                  |
| P051CLO | ET      | MPL    | p.W515L          | 6                        | 16                  |
| A003CBE | PV      | JAK2   | p.V617F          | 96                       | 1,4                 |
| A004CFJ | PV      | JAK2   | p.V617F          | 82                       | 94                  |
| A006CBJ | PV      | JAK2   | p.V617F          | 88                       | 90                  |
| A008CMJ | PV      | JAK2   | p.V617F          | 23                       | 92                  |
| A017CMI | PV      | JAK2   | p.V617F          | 44                       | 0                   |
| A020CLJ | PV      | JAK2   | p.V617F          | 94                       | 47                  |
| A028CBG | PV      | JAK2   | p.V617F          | 47                       | 1,6                 |
| A029CCM | PV      | JAK2   | p.V617F          | 10                       | 16                  |
| B009CLM | PV      | JAK2   | p.V617F          | 38                       | 49                  |
| B010CMG | PV      | JAK2   | p.V617F          | 39                       | 40                  |
| B014CPJ | PV      | JAK2   | p.V617F          | 17                       | 14                  |
| B031CDM | PV      | JAK2   | p.V617F          | 68                       | 57                  |
| B033CCY | PV      | JAK2   | p.V617F          | 31                       | 11                  |
| R025CJC | PV      | JAK2   | p.V617F          | 39                       | 0                   |

**Table SIII:** Distribution by gene and allele burden of frequently mutated genes in leukemic transformation and matched diagnosis/chronic phase

| <b>Gene mutated</b>   | <b>Number of mutations</b> | <b>Present at diagnosis [VAF(%)]</b>  | <b>Present at diagnosis at a low level and not detected [VAF(%)]</b> | <b>Appeared at leukemic transformation</b> |
|-----------------------|----------------------------|---------------------------------------|----------------------------------------------------------------------|--------------------------------------------|
| <i>TP53</i>           | 12                         | 3<br>[2; 3; 4; 26]                    | 3<br>[0.05; 1.4; 3]                                                  | 6                                          |
| <i>NRAS</i>           | 3                          | 0                                     | 0                                                                    | 3                                          |
| <i>RUNX1</i>          | 10                         | 2<br>[7;52]                           | 2<br>[0.14; 0.3]                                                     | 6                                          |
| <i>IDH1/2</i>         | 8                          | 4<br>[15; 46; 48; 48]                 | 2<br>[0.12]                                                          | 2                                          |
| <i>TET2</i>           | 9                          | 6<br>[3; 6; 8; 9; 44]                 | 1<br>[0.5]                                                           | 2                                          |
| <i>DNMT3A</i>         | 6                          | 5<br>[23; 28; 41; 50; 51]             | 1<br>[2]                                                             | 0                                          |
| <i>ASXL1</i>          | 8                          | 4<br>[9; 23; 29; 34]                  | 2<br>[1; 1.2]                                                        | 2                                          |
| <b>Splicing genes</b> | 11                         | 8<br>[18; 26; 28; 32; 40; 45; 46; 55] | 1<br>[0.2]                                                           | 2                                          |

**Table SIV:** Results of NGS sequencing of additional samples between diagnosis and leukemic transformation

| Patient                                          | Mutations                                         | Diagnosis | Additional samples |     | Leukemic Transformation |
|--------------------------------------------------|---------------------------------------------------|-----------|--------------------|-----|-------------------------|
| A023CTL                                          | <b>Duration of follow-up (years)</b>              | 0         | 8                  | 11  | 12                      |
|                                                  | TET2:NM_001127208:exon10:c.4312dupA:p.R1440Tfs*37 | 23        | 40                 | 46  | 59                      |
|                                                  | CALR Type 2                                       | 15        | 93                 | 99  | 100                     |
|                                                  | ASXL1:NM_015338:exon12:c.1934dupG:p.G642fs        | 0         | 0                  | 13  | 27                      |
|                                                  | EZH2:NM_004456:exon8:c.T851A:p.L284H              | 0         | 0                  | 10  | 66                      |
|                                                  | NRAS:NM_002524:exon3:c.G179A:p.G60E               | 0         | 0                  | 24  | 1,6                     |
|                                                  | EZH2:NM_004456:exon13:c.G1546T:p.D516Y            | 0         | 0                  | 0   | 11                      |
| A006CBJ                                          | <b>Duration of follow-up (years)</b>              | 0         | 4                  |     | 5                       |
|                                                  | JAK2 V617F                                        | 88        | 9                  |     | 89                      |
|                                                  | IDH2:NM_002168:exon4:c.G419A:p.R140Q              | 45,5      | 20                 |     | 51                      |
|                                                  | SRSF2:NM_003016:exon1:c.C284A:p.P95H              | 40        | 20                 |     | 41                      |
|                                                  | PHF6:NM_032458:exon9:c.T962G:p.I321S              | 0         | 0                  |     | 37                      |
|                                                  | RUNX1:NM_001754:exon9:c.T1047A:p.Y349X            | 0         | 0                  |     | 35                      |
|                                                  | RUNX1:NM_001754:exon8:c.C958T:p.R320X             | 0,14      | 0,27               |     | 46                      |
|                                                  | ZRSR2:NM_005089:exon11:c.A989G:p.H330R            | 0         | 0                  |     | 9                       |
|                                                  | BCOR:NM_001123385:exon4:c.2236_2237ins14:p.R746fs | 0         | 0                  |     | 4,1                     |
| BCOR:NM_001123385:exon4:c.2211_2212ins5:p.T738fs | 0                                                 | 0         |                    | 5,6 |                         |
| A019CCV                                          | <b>Duration of follow-up (years)</b>              | 0         | 11                 |     | 12                      |
|                                                  | JAK2 V617F                                        | 25        | 88                 |     | 94                      |
|                                                  | TP53:NM_001276761:exon7:c.G626A:p.R209Q           | 3         | 3                  |     | 0                       |
|                                                  | TP53:NM_001276761:exon7:c.G594A:p.M198I           | 1,4       | 13                 |     | 84                      |
| B031CDM                                          | <b>Duration of follow-up (years)</b>              | 0         | 4                  |     | 6                       |
|                                                  | JAK2 V617F                                        | 68        | 62                 |     | 57                      |
|                                                  | DOT1L:NM_032482:exon24:c.C3271T:p.R1091X          | 0         | 0                  |     | 47                      |
|                                                  | RUNX1:NM_001754:exon5:c.A484G:p.R162G             | 0         | 0                  |     | 57                      |
| B032CFJ                                          | <b>Duration of follow-up (years)</b>              | 0         | 3                  |     | 4                       |
|                                                  | CALR Type 2                                       | 55        | 58                 |     | 54                      |
|                                                  | ASXL1:NM_015338:exon12:c.1927dupG:p.G642fs        | 8,9       | 11                 |     | 19                      |
|                                                  | PDS5B:NM_015032:exon30:c.A3488G:p.N1163S          | 50        | 50                 |     | 49                      |
|                                                  | SUZ12:NM_015355:exon15:c.A1814T:p.D605V           | 0,4       | 32                 |     | 86                      |
|                                                  | NRAS:NM_002524:exon2:c.G35A:p.G12D                | 0         | 0                  |     | 45,6                    |
| A016CLJ                                          | <b>Duration of follow-up (years)</b>              | 0         | 11                 |     | 12                      |
|                                                  | JAK2 V617F                                        | 25        | 3,8                |     | 2,3                     |
|                                                  | TET2:NM_001127208:exon6:c.C3646T:p.R1216X         | 0         | 22                 |     | 2,3                     |
|                                                  | TP53:NM_000546:exon6:c.A578T:p.H193L              | 0         | 0                  |     | 33                      |
| A017CMI                                          | <b>Duration of follow-up (years)</b>              | 0         | 8                  | 9   | 10                      |
|                                                  | JAK2 V617F                                        | 44        | 80                 | 60  | 1,4                     |
|                                                  | TET2:NM_001127208:exon10:c.4293delT:p.S1431Rfs*16 | 0,6       | 0                  | 0,8 | 0                       |
|                                                  | TET2:NM_017628:exon3:c.G3410T:p.G1137V            | 3         | 0                  | 0   | 0                       |
|                                                  | TET2:NM_001127208:exon7:c.G3893A:p.C1298Y         | 0,5       | 0,26               | 0,4 | 57                      |
|                                                  | TP53:NM_000546:exon5:c.T526A:p.C176S              | 0         | 0                  | 0   | 85                      |

**Table SV** Multivariate analysis for leukemia-free survival taking into account weighting

|                                            | HR [95% IC]             | <i>p</i> value |
|--------------------------------------------|-------------------------|----------------|
| <b>Age at the time of sampling</b>         | <b>1.07 [1.03-1.12]</b> | <b>0.0004</b>  |
| Gender (Male)                              | 1.80 [0.73-4.52]        | 0.203          |
| Diagnosis (PV)                             | 0.59 [0.24-1.50]        | 0.265          |
| Driver mutation (reference = <i>CALR</i> ) |                         |                |
| <i>JAK2V617F</i>                           | 1.88 [0.45-7.90]        | 0.391          |
| <i>MPLW515</i>                             | 6.45 [1.04-39.7]        | 0.051          |
| Triple negative                            | 3.13 [0.715-13.7]       | 0.130          |
| <b>≥ 1 additional mutation</b>             | <b>4.78 [1.75-13.0]</b> | <b>0.002</b>   |

**Table SVI:** Characteristics of non-transforming patients in the control cohort of PV and ET

| sample   | Gender | Diagnosis | Age at the time of sampling | Follow-up from diagnosis (year) | Follow-up post sampling | Driver | Number of additional mutations | Genes mutated      |
|----------|--------|-----------|-----------------------------|---------------------------------|-------------------------|--------|--------------------------------|--------------------|
| HD-1251  | F      | ET        | 56,76                       | 13,73                           | 5,79                    | CALR   | 0                              |                    |
| HD-1183  | F      | ET        | 75,11                       | 28,54                           | 5,80                    | CALR   | 0                              |                    |
| HD-0552  | F      | ET        | 50,80                       | 11,67                           | 9,52                    | CALR   | 0                              |                    |
| HD-0561  | M      | ET        | 51,15                       | 11,83                           | 4,67                    | JAK2   | 0                              |                    |
| HD-0581  | M      | ET        | 30,33                       | 18,14                           | 8,84                    | JAK2   | 0                              |                    |
| HD-0550  | F      | ET        | 40,93                       | 16,89                           | 9,83                    | CALR   | 0                              |                    |
| HD-1565  | M      | ET        | 55,43                       | 25,86                           | 4,94                    | MPL    | 0                              |                    |
| HD-0867  | F      | ET        | 56,41                       | 11,96                           | 6,29                    | JAK2   | 1                              | CUX1               |
| 495196   | M      | ET        | 51,23                       | 12,92                           | 4,59                    | JAK2   | 2                              | EZH2, NF1          |
| 14C00899 | F      | ET        | 66,07                       | 16,19                           | 5,47                    | JAK2   | 0                              |                    |
| 460976   | F      | ET        | 61,58                       | 25,18                           | 2,26                    | JAK2   | 0                              |                    |
| HD-1885  | F      | ET        | 67,90                       | 19,54                           | 5,90                    | JAK2   | 2                              | NOTCH1, TET2       |
| 375976   | F      | ET        | 34,40                       | 19,86                           | 9,98                    | CALR   | 0                              |                    |
| HD-1351  | F      | ET        | 72,48                       | 14,86                           | 5,54                    | JAK2   | 1                              | NFE2               |
| HD-1392  | M      | ET        | 57,77                       | 21,57                           | 5,42                    | JAK2   | 0                              |                    |
| PA-C026  | M      | ET        | 63,38                       | 10,42                           | 10,28                   | CALR   | 0                              |                    |
| PA-C027  | F      | ET        | 72,31                       | 9,62                            | 9,49                    | CALR   | 0                              |                    |
| PA-C028  | M      | ET        | 61,20                       | 10,02                           | 9,88                    | CALR   | 3                              | TET2 (n=3)         |
| PA-C029  | M      | ET        | 58,17                       | 10,48                           | 10,34                   | CALR   | 0                              |                    |
| PA-C030  | M      | ET        | 73,41                       | 11,38                           | 11,23                   | CALR   | 0                              |                    |
| PA-C031  | F      | ET        | 68,75                       | 11,66                           | 10,90                   | CALR   | 0                              |                    |
| PA-C032  | F      | ET        | 63,54                       | 12,05                           | 11,89                   | CALR   | 0                              |                    |
| PA-C033  | F      | ET        | 25,23                       | 13,18                           | 13,00                   | CALR   | 0                              |                    |
| PA-C034  | F      | ET        | 50,74                       | 12,53                           | 12,35                   | CALR   | 0                              |                    |
| PA-C035  | M      | ET        | 61,19                       | 12,86                           | 12,68                   | CALR   | 1                              | CBL                |
| PA-C036  | F      | ET        | 62,85                       | 8,87                            | 8,73                    | TN     | 0                              |                    |
| PA-C037  | F      | ET        | 65,52                       | 8,34                            | 8,23                    | TN     | 0                              |                    |
| PA-C038  | M      | ET        | 58,83                       | 13,55                           | 2,93                    | TN     | 0                              |                    |
| PA-C039  | F      | ET        | 64,93                       | 12,44                           | 12,58                   | JAK2   | 0                              |                    |
| PA-C040  | M      | ET        | 45,25                       | 12,55                           | 12,38                   | JAK2   | 1                              | SH2B3              |
| PA-C041  | F      | ET        | 69,86                       | 10,85                           | 10,81                   | JAK2   | 0                              |                    |
| PA-C042  | M      | ET        | 68,09                       | 12,90                           | 11,94                   | JAK2   | 3                              | CALR, KMT2A, TP53  |
| PA-C043  | F      | ET        | 55,27                       | 11,56                           | 11,28                   | JAK2   | 1                              | ASXL1              |
| PA-C044  | F      | ET        | 41,90                       | 12,16                           | 12,69                   | JAK2   | 0                              |                    |
| PA-C045  | F      | ET        | 70,61                       | 11,97                           | 11,96                   | JAK2   | 1                              | NOTCH1             |
| PA-C046  | F      | ET        | 50,50                       | 11,82                           | 11,73                   | TN     | 0                              |                    |
| PA-C047  | F      | ET        | 34,95                       | 9,67                            | 9,54                    | TN     | 0                              |                    |
| PA-C048  | F      | ET        | 31,17                       | 13,49                           | 13,23                   | TN     | 0                              |                    |
| PA-C049  | F      | ET        | 60,77                       | 10,51                           | 10,51                   | JAK2   | 0                              |                    |
| PA-C050  | F      | ET        | 56,47                       | 10,84                           | 10,76                   | JAK2   | 1                              | STAG2              |
| PA-C051  | M      | ET        | 59,04                       | 11,06                           | 11,00                   | JAK2   | 4                              | BCOR, CHEK2 (n=2), |

|          |   |    |       |       |       |      |   |                    |
|----------|---|----|-------|-------|-------|------|---|--------------------|
|          |   |    |       |       |       |      |   | DNMT3A             |
| PA-C052  | M | ET | 49,13 | 11,12 | 11,01 | JAK2 | 0 |                    |
| PA-C053  | F | ET | 59,06 | 13,43 | 13,28 | JAK2 | 0 |                    |
| HD-0578  | F | PV | 57,70 | 15,89 | 7,24  | JAK2 | 0 |                    |
| HD-1270  | M | PV | 35,06 | 14,86 | 5,90  | JAK2 | 0 |                    |
| HD-1820  | M | PV | 57,75 | 25,65 | 5,88  | JAK2 | 0 |                    |
| HD-1393  | F | PV | 56,20 | 17,58 | 5,18  | JAK2 | 1 | NOTCH1             |
| HD-0503  | F | PV | 58,68 | 13,98 | 9,60  | JAK2 | 1 | NOTCH1             |
| 416901   | F | PV | 59,78 | 28,84 | 7,55  | JAK2 | 0 |                    |
| 14C05968 | F | PV | 69,19 | 12,19 | 4,92  | JAK2 | 0 |                    |
| HD-2392  | F | PV | 65,92 | 12,61 | 2,96  | JAK2 | 0 |                    |
| HD-2005  | F | PV | 66,10 | 17,45 | 5,56  | JAK2 | 1 | TET2               |
| HD-2452  | F | PV | 83,50 | 19,16 | 2,40  | JAK2 | 2 | DNMT3A, IDH2       |
| HD-1731  | M | PV | 84,86 | 21,15 | 6,84  | JAK2 | 0 |                    |
| HD-2369  | F | PV | 60,13 | 24,03 | 2,79  | JAK2 | 1 | TET2               |
| PA-C001  | M | PV | 57,61 | 13,68 | 13,72 | JAK2 | 1 | NFE2               |
| PA-C002  | F | PV | 33,93 | 15,35 | 15,14 | JAK2 | 0 |                    |
| PA-C003  | F | PV | 41,67 | 9,54  | 9,49  | JAK2 | 2 | BCORL1, CBL        |
| PA-C004  | F | PV | 46,20 | 9,78  | 9,24  | JAK2 | 0 |                    |
| PA-C005  | M | PV | 68,22 | 10,06 | 9,93  | JAK2 | 3 | DNMT3A, NFE2, TET2 |
| PA-C006  | M | PV | 53,09 | 11,10 | 13,11 | JAK2 | 2 | DNMT3A, PDS5B      |
| PA-C007  | M | PV | 54,38 | 14,47 | 14,27 | JAK2 | 2 | NFE2, TET2         |
| PA-C008  | F | PV | 57,53 | 11,09 | 11,03 | JAK2 | 0 |                    |
| PA-C009  | M | PV | 60,81 | 11,13 | 10,89 | JAK2 | 0 |                    |
| PA-C010  | F | PV | 65,49 | 11,18 | 11,05 | JAK2 | 0 |                    |
| PA-C011  | F | PV | 75,08 | 12,54 | 12,35 | JAK2 | 0 |                    |
| PA-C012  | M | PV | 57,38 | 9,65  | 9,55  | JAK2 | 1 | NOTCH1             |
| PA-C013  | F | PV | 80,92 | 10,60 | 10,45 | JAK2 | 2 | TET2 (n=2)         |
| PA-C014  | M | PV | 26,08 | 11,04 | 10,99 | JAK2 | 0 |                    |
| PA-C015  | M | PV | 50,79 | 10,07 | 9,96  | JAK2 | 0 |                    |
| PA-C016  | M | PV | 65,95 | 11,54 | 11,43 | JAK2 | 0 |                    |
| PA-C017  | M | PV | 65,83 | 10,27 | 10,18 | JAK2 | 1 | TET2               |
| PA-C018  | M | PV | 49,56 | 10,27 | 10,13 | JAK2 | 0 |                    |
| PA-C019  | F | PV | 78,88 | 10,94 | 10,82 | JAK2 | 1 | TET2               |
| PA-C020  | M | PV | 62,60 | 10,53 | 10,41 | JAK2 | 0 |                    |
| PA-C021  | F | PV | 71,84 | 11,79 | 11,74 | JAK2 | 0 |                    |
| PA-C022  | M | PV | 56,11 | 11,11 | 10,96 | JAK2 | 0 |                    |
| PA-C023  | F | PV | 70,30 | 11,12 | 11,02 | JAK2 | 1 | TET2               |
| PA-C024  | M | PV | 66,80 | 8,96  | 8,92  | JAK2 | 1 | TET2               |
| PA-C025  | M | PV | 63,49 | 12,31 | 12,14 | JAK2 | 0 |                    |

**Table SVII:** List of mutations found in leukemic transformation and matched diagnosis/chronic phases

| N° Patient | Disease | Gene   | Transcript   | Exon | Mutation on cDNA | Proteic change | COSMIC                | Classification | Chronic phase |           | Leukemic transformation |           |
|------------|---------|--------|--------------|------|------------------|----------------|-----------------------|----------------|---------------|-----------|-------------------------|-----------|
|            |         |        |              |      |                  |                |                       |                | VAF %         | Depth (X) | VAF %                   | Depth (X) |
| A001CDS    | TE      | MPL    | NM_005373    | 10   | c.G1544T         | p.W515L        | COSM3719407;COSM18918 | A              | 8             | 719       | 27                      | 973       |
| A001CDS    | TE      | ATM    | NM_000051    | 15   | c.T2289A         | p.F763L        | -                     | C              | 49            | 639       | 51                      | 494       |
| A001CDS    | TE      | CUX1   | NM_001202543 | 10   | c.A815G          | p.N272S        | -                     | C              | 53            | 240       | 57                      | 332       |
| A001CDS    | TE      | NF1    | NM_001042492 | 4    | c.A442G          | p.N148D        | -                     | B              | 38            | 830       | 41                      | 600       |
| A001CDS    | TE      | U2AF1  | NM_006758    | 6    | c.A470C          | p.Q157P        | -                     | A              | 32            | 2712      | 38                      | 2212      |
| A001CDS    | TE      | EZH2   | NM_004456    | 17   | c.1986_1987del   | p.V662fs       | -                     | A              | 0             | 1316      | 26                      | 864       |
| A002CBA    | TE      | JAK2   | NM_004972    | 14   | c.G1849T         | p.V617F        | COSM12600             | A              | 34            | 2055      | 0,57                    | 494       |
| A002CBA    | TE      | SF3B1  | NM_012433    | 15   | c.A2098G         | p.K700E        | COSM84677             | A              | 8             | 2374      | 0                       | 622       |
| A002CBA    | TE      | ZRSR2  | NM_005089    | 7    | c.G441C          | p.L147F        | -                     | C              | 55            | 1798      | 40                      | 731       |
| A002CBA    | TE      | TP53   | NM_000546    | 6    | c.A641G          | p.H214R        | COSM307279            | A              | 0.05          | 4172      | 49                      | 473       |
| A002CBA    | TE      | TP53   | NM_000546    | 6    | c.T613G          | p.Y205D        | COSM43687             | A              | 0             | 4259      | 39                      | 1820      |
| A002CBA    | TE      | ATM    | NM_000051    | 50   | c.G7328A         | p.R2443Q       | COSM20404             | B              | 0.5           | 1984      | 33                      | 570       |
| A003CBE    | PV      | JAK2   | NM_004972    | 14   | c.G1849T         | p.V617F        | COSM12600             | A              | 96            | 1748      | 98                      | 934       |
| A003CBE    | PV      | DNMT3A | NM_022552    | 3    | c.A89C           | p.E30A         | COSM307361            | B              | 50            | 2690      | 46                      | 1323      |
| A003CBE    | PV      | PTPN11 | NM_002834    | 13   | c.G1508A         | p.G503E        | COSM13021             | A              | 0             | 2470      | 45                      | 1493      |
| A003CBE    | PV      | WT1    | NM_024426    | 7    | c.1139_1148dup   | p.R380fs       | -                     | A              | 0             | 2270      | 39                      | 831       |
| A003CBE    | PV      | GATA2  | NM_032638    | 6    | c.1160_1171del   | p.387_391del   | -                     | A              | 0             | 2110      | 14                      | 911       |
| A004CFJ    | PV      | JAK2   | NM_004972    | 14   | c.G1849T         | p.V617F        | COSM12600             | A              | 82            | 825       | 38                      | 472       |
| A004CFJ    | PV      | ATRX   | NM_000489    | 13   | c.G4156A         | p.E1386K       | -                     | B              | 52            | 1546      | 52                      | 550       |
| A004CFJ    | PV      | RUNX1  | NM_001754    | 6    | c.G602A          | p.R201Q        | COSM24805             | A              | 0             | 1937      | 81                      | 368       |
| A004CFJ    | PV      | EZH2   | NM_004456    | 18   | c.C2084T         | p.S695L        | -                     | B              | 0             | 394       | 67                      | 136       |
| A004CFJ    | PV      | IDH1   | NM_005896    | 4    | c.C394T          | p.R132C        | COSM28747             | A              | 0.12          | 3408      | 49                      | 401       |
| A004CFJ    | PV      | FLT3   | NM_004119    | 20   | c.G2503T         | p.D835Y        | COSM783               | A              | 0             | 4736      | 44                      | 370       |
| A004CFJ    | PV      | PHF6   | NM_032458    | 9    | c.T941C          | p.I314T        | -                     | B              | 0             | 6646      | 40                      | 478       |

|         |    |       |              |    |                                     |               |                                  |   |      |      |     |      |
|---------|----|-------|--------------|----|-------------------------------------|---------------|----------------------------------|---|------|------|-----|------|
| A005CLC | TE | JAK2  | NM_004972    | 14 | c.G1849T                            | p.V617F       | COSM12600                        | A | 27   | 2161 | 0.5 | 734  |
| A005CLC | TE | ASXL1 | NM_015338    | 12 | c.1927dupG                          | p.G642fs      | COSM4170082;COSM1411076          | A | 23   | 1499 | 24  | 542  |
| A005CLC | TE | EZH2  | NM_004456    | 15 | c.A1720G                            | p.K574E       | COSM5879093;COSM5879094          | A | 16   | 373  | 72  | 230  |
| A005CLC | TE | HRAS  | NM_176795    | 5  | c.500dupC                           | p.P167fs      | -                                | A | 62   | 616  | 59  | 153  |
| A005CLC | TE | KMT2A | NM_001197104 | 27 | c.G6572A                            | p.R2191Q      | -                                | C | 50   | 431  | 47  | 271  |
| A005CLC | TE | RUNX1 | NM_001754    | 4  | c.T155A                             | p.M52K        | COSM42095                        | A | 52   | 2065 | 47  | 505  |
| A005CLC | TE | TET2  | NM_001127208 | 3  | c.558delG                           | p.E186fs      | -                                | A | 9    | 3382 | 38  | 1227 |
| A005CLC | TE | TET2  | NM_001127208 | 6  | c.G3662A                            | p.C1221Y      | COSM211717                       | A | 44   | 963  | 38  | 894  |
| A005CLC | TE | RAD21 | NM_006265    | 6  | c.559_560insGC                      | p.T187fs      | -                                | A | 0    | 765  | 32  | 271  |
| A006CBJ | PV | JAK2  | NM_004972    | 14 | c.G1849T                            | p.V617F       | COSM12600                        | A | 88   | 1128 | 89  | 638  |
| A006CBJ | PV | IDH2  | NM_002168    | 4  | c.G419A                             | p.R140Q       | COSM41590                        | A | 46   | 1641 | 51  | 1232 |
| A006CBJ | PV | SRSF2 | NM_003016    | 1  | c.C284A                             | p.P95H        | COSM211505;COSM211029;COSM211504 | A | 40   | 393  | 41  | 534  |
| A006CBJ | PV | PHF6  | NM_032458    | 9  | c.T962G                             | p.I321S       | -                                | B | 0    | 711  | 37  | 393  |
| A006CBJ | PV | RUNX1 | NM_001754    | 9  | c.T1047A                            | p.Y349X       | -                                | A | 0    | 1885 | 35  | 1528 |
| A006CBJ | PV | RUNX1 | NM_001754    | 8  | c.C958T                             | p.R320X       | COSM41699                        | A | 0,14 | 1849 | 46  | 1741 |
| A006CBJ | PV | ZRSR2 | NM_005089    | 11 | c.A989G                             | p.H330R       | -                                | B | 0    | 418  | 9   | 308  |
| A006CBJ | PV | BCOR  | NM_001123385 | 4  | c.2236_2237insC<br>CAAAGGGGGG<br>GT | p.R746fs      | -                                | A | 0    | 432  | 4   | 316  |
| A006CBJ | PV | BCOR  | NM_001123385 | 4  | c.2211_2212insC<br>GGCC             | p.T738fs      | -                                | A | 0    | 573  | 6   | 445  |
| A007CGP | TE | JAK2  | NM_004972    | 14 | c.G1849T                            | p.V617F       | COSM12600                        | A | 19   | 1247 | 1,4 | 717  |
| A007CGP | TE | TP53  | NM_000546    | 6  | c.T584C                             | p.I195T       | COSM3421936;COSM116924           | A | 26   | 1979 | 76  | 628  |
| A007CGP | TE | ATM   | NM_000051    | 26 | c.G3752T                            | p.C1251F      | -                                | C | 0    | 697  | 2   | 478  |
| A007CGP | TE | FLT3  | NM_004119    | 10 | c.G1273T                            | p.A425S       | -                                | C | 0    | 658  | 3   | 367  |
| A007CGP | TE | NRAS  | NM_002524    | 3  | c.C181A                             | p.Q61K        | COSM580                          | A | 0    | 1031 | 12  | 399  |
| A007CGP | TE | NRAS  | NM_002524    | 2  | c.G37C                              | p.G13R        | COSM569                          | A | 0    | 1494 | 5   | 771  |
| A008CMJ | PV | JAK2  | NM_004972    | 14 | c.G1849T                            | p.V617F       | COSM12600                        | A | 23   | 1182 | 0   | 1196 |
| A008CMJ | PV | ASXL1 | NM_015338    | 12 | c.1901_1923del                      | p.E635Rfs*13  | -                                | A | 29   | 658  | 33  | 740  |
| A008CMJ | PV | EZH2  | NM_004456    | 19 | c.G2128T                            | p.D710Y       | -                                | B | 43   | 491  | 80  | 802  |
| A008CMJ | PV | NF1   | NM_001042492 | 40 | c.5950_5972del                      | p.N1984Yfs*17 | -                                | A | 6    | 973  | 37  | 763  |



|         |    |        |              |    |                |               |                                                             |   |      |       |    |      |
|---------|----|--------|--------------|----|----------------|---------------|-------------------------------------------------------------|---|------|-------|----|------|
| A008CMJ | PV | RUNX1  | NM_001754    | 7  | c.725_737del   | p.H242Rfs*7   | -                                                           | A | 7    | 261   | 63 | 401  |
| A008CMJ | PV | BCOR   | NM_001123385 | 4  | c.C2428T       | p.R810X       | COSM2150191;COSM2150192                                     | A | 0    | 683   | 5  | 614  |
| A008CMJ | PV | NF1    | NM_001042492 | 27 | c.G3649T       | p.D1217Y      | -                                                           | B | 0    | 641   | 33 | 530  |
| A008CMJ | PV | NF1    | NM_001042492 | 5  | c.T536A        | p.L179X       | -                                                           | A | 0    | 734   | 3  | 526  |
| A008CMJ | PV | RUNX1  | NM_001754    | 9  | c.G1420A       | p.E474K       | -                                                           | B | 0    | 391   | 27 | 249  |
| B009CLM | PV | JAK2   | NM_004972    | 14 | c.G1849T       | p.V617F       | COSM12600                                                   | A | 38   | 543   | 16 | 391  |
| B009CLM | PV | IDH2   | NM_002168    | 4  | c.G419A        | p.R140Q       | COSM41590                                                   | A | 48   | 374   | 41 | 202  |
| B009CLM | PV | SH2B3  | NM_005475    | 6  | c.G1159A       | p.G387R       | COSM6022915                                                 | A | 15   | 311   | 17 | 105  |
| B009CLM | PV | SRSF2  | NM_003016    | 1  | c.C284T        | p.P95L        | COSM146288;COSM211506;COSM211028                            | A | 46   | 186   | 39 | 44   |
| B009CLM | PV | IDH2   | NM_002168    | 5  | c.A536T        | p.Y179F       | -                                                           | B | 0    | 771   | 5  | 386  |
| B009CLM | PV | STAG2  | NM_001042749 | 11 | c.947_959del   | p.K317Mfs*8   | -                                                           | A | 0    | 285   | 23 | 123  |
| B010CMG | PV | JAK2   | NM_004972    | 14 | c.G1849T       | p.V617F       | COSM12600                                                   | A | 39   | 275   | 49 | 243  |
| B010CMG | PV | ASXL1  | NM_015338    | 12 | c.2343dupG     | p.H782Afs*4   | -                                                           | A | 34   | 122   | 43 | 51   |
| B010CMG | PV | KRAS   | NM_033360    | 3  | c.G178C        | p.G60R        | COSM4384680;COSM4384681                                     | A | 29   | 485   | 11 | 247  |
| B010CMG | PV | MPL    | NM_005373    | 10 | c.1543TG>GC    | p.W515A       | OCM27289                                                    | A | 8    | 979   | 0  | 506  |
| B010CMG | PV | SETBP1 | NM_015559    | 4  | c.A2605C       | p.S869R       | COSM1716867                                                 | A | 0    | 11647 | 32 | 338  |
| B011CNA | TE | ASXL1  | NM_015338    | 12 | c.1888_1910del | p.E635Rfs*13  | -                                                           | A | NA   | NA    | 8  | 220  |
| B011CNA | TE | NRAS   | NM_002524    | 2  | c.G37T         | p.G13C        | COSM570                                                     | A | NA   | NA    | 7  | 601  |
| B011CNA | TE | EZH2   | NM_004456    | 14 | c.G1650T       | p.K550N       | -                                                           | B | NA   | NA    | 68 | 347  |
| B012CPL | TE | JAK2   | NM_004972    | 14 | c.G1849T       | p.V617F       | COSM12600                                                   | A | NA   | NA    | 33 | 1274 |
| B012CPL | TE | KMT2A  | NM_001197104 | 27 | c.G8432A       | p.R2811H      | -                                                           | C | NA   | NA    | 48 | 1857 |
| B012CPL | TE | TET2   | NM_001127208 | 11 | c.5526_5538del | p.N1843Gfs*39 | -                                                           | A | NA   | NA    | 35 | 1971 |
| B012CPL | TE | TP53   | NM_000546    | 8  | c.C844G        | p.R282G       | COSM10992;COSM3675520;COSM99934;<br>COSM1725698             | A | NA   | NA    | 20 | 2620 |
| B012CPL | TE | TP53   | NM_000546    | 4  | c.G273A        | p.W91X        | COSM562611;COSM562612;COSM44492;<br>COSM1646881;COSM3958856 | A | NA   | NA    | 29 | 2531 |
| B013CPR | TE | JAK2   | NM_004972    | 14 | c.G1849T       | p.V617F       | COSM12600                                                   | A | 47   | 5490  | 40 | 455  |
| B013CPR | TE | KMT2A  | NM_005933    | 3  | c.C2401T       | p.H801Y       | -                                                           | B | 50   | 2258  | 49 | 600  |
| B013CPR | TE | U2AF1  | NM_006758    | 6  | c.A470C        | p.Q157P       | COSM211534;COSM1318797                                      | A | 45   | 7886  | 43 | 836  |
| B013CPR | TE | EZH2   | NM_004456    | 19 | c.T2191G       | p.Y731D       | COSM4384242;COSM53021                                       | A | 0.03 | 8465  | 41 | 386  |

|         |    |        |              |    |                                                |                            |                                 |   |     |       |     |      |
|---------|----|--------|--------------|----|------------------------------------------------|----------------------------|---------------------------------|---|-----|-------|-----|------|
| B013CPR | TE | IDH1   | NM_005896    | 4  | c.C394T                                        | p.R132C                    | COSM28747                       | A | 0   | 576   | 4   | 247  |
| B013CPR | TE | ASXL1  | NM_015338    | 12 | c.C2485T                                       | p.Q829X                    | COSM97040;COSM5989689           | A | 0   | 1314  | 44  | 554  |
| B014CPJ | PV | ETNK1  | NM_018638    | 1  | c.124delG                                      | p.A42Pfs*40                | -                               | A | 52  | 1141  | 50  | 307  |
| B014CPJ | PV | JAK2   | NM_004972    | 14 | c.G1849T                                       | p.V617F                    | COSM12600                       | A | 17  | 2419  | 14  | 2138 |
| B014CPJ | PV | BCOR   | NM_001123385 | 11 | c.T4448G                                       | p.L1483X                   | -                               | A | 0   | 2784  | 14  | 609  |
| B014CPJ | PV | U2AF1  | NM_006758    | 2  | c.C101T                                        | p.S34F                     | -                               | A | 0.2 | 4393  | 9.6 | 785  |
| B014CPJ | PV | FLT3   | NM_004119    | 14 | c.1802_1803insG<br>GGGAGAGAATA<br>TGAATATGATCT | p.L601_K602insG<br>REYEYDL | -                               | A | 0   | 11433 | 1.5 | 3168 |
| A015CSE | TE | JAK2   | NM_004972    | 14 | c.G1849T                                       | p.V617F                    | COSM12600                       | A | 10  | 666   | 0   | 1254 |
| A015CSE | TE | CHEK2  | NM_001005735 | 2  | c.A148G                                        | p.S50G                     | -                               | B | 59  | 326   | 54  | 756  |
| A015CSE | TE | SUZ12  | NM_015355    | 1  | c.A151G                                        | p.S51G                     | -                               | C | 48  | 211   | 56  | 416  |
| A015CSE | TE | IDH1   | NM_005896    | 4  | c.C394G                                        | p.R132G                    | COSM28749                       | A | 2   | 951   | 37  | 348  |
| A015CSE | TE | DNMT3A | NM_022552    | 19 | c.T2306A                                       | p.I769N                    | -                               | B | 2   | 624   | 84  | 1645 |
| A015CSE | TE | ETV6   | NM_001987    | 3  | c.G271A                                        | p.G91S                     | -                               | B | 0   | 873   | 42  | 1353 |
| A016CLJ | TE | JAK2   | NM_004972    | 14 | c.G1849T                                       | p.V617F                    | COSM12600                       | A | 25  | 1284  | 2   | 1023 |
| A016CLJ | TE | RBBP6  | NM_006910    | 18 | c.C4705T                                       | p.R1569C                   | -                               | B | 46  | 934   | 48  | 723  |
| A016CLJ | TE | TET2   | NM_001127208 | 6  | c.C3646T                                       | p.R1216X                   | COSM42029                       | A | 0   | 712   | 2   | 512  |
| A016CLJ | TE | TP53   | NM_000546    | 6  | c.A578T                                        | p.H193L                    | COSM11066;COSM99918;COSM2744772 | A | 0   | 889   | 33  | 833  |
| A017CMI | PV | JAK2   | NM_004972    | 14 | c.G1849T                                       | p.V617F                    | COSM12600                       | A | 44  | 1010  | 1.4 | 1244 |
| A017CMI | PV | TET2   | NM_001127208 | 10 | c.4293delT                                     | p.S1431Rfs*16              | -                               | A | 0,6 | 1681  | 0   | 2149 |
| A017CMI | PV | TET2   | NM_017628    | 3  | c.G3410T                                       | p.G1137V                   | COSM3735043                     | B | 3   | 631   | 0   | 1274 |
| A017CMI | PV | TET2   | NM_001127208 | 7  | c.G3893A                                       | p.C1298Y                   | COSM87138                       | B | 0.5 | 1626  | 57  | 2550 |
| A017CMI | PV | TP53   | NM_000546    | 5  | c.T526A                                        | p.C176S                    | COSM44146;COSM1324781           | A | 0   | 1050  | 85  | 924  |
| A019CCV | TE | JAK2   | NM_004972    | 14 | c.G1849T                                       | p.V617F                    | COSM12600                       | A | 25  | 1284  | 94  | 373  |
| A019CCV | TE | KMT2A  | NM_001197104 | 27 | c.T8168C                                       | p.V2723A                   | -                               | C | 46  | 376   | 32  | 41   |
| A019CCV | TE | TP53   | NM_001276761 | 7  | c.G626A                                        | p.R209Q                    | COSM99602;COSM99021;COSM99020   | A | 3   | 1102  | 0   | 286  |
| A019CCV | TE | TP53   | NM_001276761 | 7  | c.G594A                                        | p.M198I                    | COSM1640835;COSM99646;COSM10834 | A | 1.4 | 1973  | 84  | 366  |
| A020CLJ | PV | JAK2   | NM_004972    | 14 | c.G1849T                                       | p.V617F                    | COSM12600                       | A | 94  | 400   | 90  | 976  |
| A020CLJ | PV | SMC3   | NM_005445    | 24 | c.2799_2801del                                 | p.K936del                  | -                               | B | 0   | 150   | 41  | 464  |

|         |    |        |              |    |                       |                   |                                     |   |      |       |     |      |
|---------|----|--------|--------------|----|-----------------------|-------------------|-------------------------------------|---|------|-------|-----|------|
| A022CMJ | TE | JAK2   | NM_004972    | 14 | c.G1849T              | p.V617F           | COSM12600                           | A | 16   | 972   | 92  | 296  |
| A022CMJ | TE | SRSF2  | NM_003016    | 1  | c.C284A               | p.P95H            | COSM211505;COSM211029;COSM211504    | A | 18   | 227   | 45  | 22   |
| A022CMJ | TE | TET2   | NM_001127208 | 11 | c.G5633A              | p.R1878H          | -                                   | C | 8    | 1311  | 45  | 218  |
| A022CMJ | TE | ASXL1  | NM_015338    | 12 | c.2591delA            | p.D864Afs*2       | -                                   | A | 1.2  | 896   | 38  | 189  |
| A022CMJ | TE | TP53   | NM_000546    | 5  | c.G524A               | p.R175H           | COSM10648;COSM3355994;COSM99022     | A | 0    | 745   | 88  | 192  |
| A023CTL | TE | CALR   | NM_004343    | 9  | c.1153_1154delinsTGTC | p.Lys385Cysfs*46  | -                                   | A | 15   | 8022  | 100 | 316  |
| A023CTL | TE | TET2   | NM_001127208 | 10 | c.4312dupA            | p.E1437fs         | COSM4385603                         | A | 23   | 11980 | 49  | 1199 |
| A023CTL | TE | ASXL1  | NM_015338    | 12 | c.1934dupG            | p.G642fs          | COSM4170082;COSM1411076             | A | 0    | 16217 | 27  | 973  |
| A023CTL | TE | EZH2   | NM_004456    | 13 | c.G1546T              | p.D516Y           | -                                   | B | 0    | 5875  | 11  | 135  |
| A023CTL | TE | EZH2   | NM_004456    | 8  | c.T851A               | p.L284H           | -                                   | B | 0.36 | 37714 | 66  | 1808 |
| A024CBT | TE | BCOR   | NM_001123385 | 12 | c.G4741T              | p.D1581Y          | COSM4109395;COSM4109396;COSM4109397 | B | 3    | 354   | 57  | 286  |
| A024CBT | TE | JAK2   | NM_004972    | 14 | c.G1849T              | p.V617F           | COSM12600                           | A | 9    | 610   | 0   | 837  |
| A024CBT | TE | DNMT3A | NM_022552    | 23 | c.C2644T              | p.R882C           | COSM53042;COSM1166704               | A | 28   | 359   | 20  | 294  |
| A024CBT | TE | ETNK1  | NM_018638    | 3  | c.G734A               | p.G245D           | -                                   | C | 3    | 692   | 25  | 651  |
| A024CBT | TE | ETV6   | NM_001987    | 3  | c.302_303insCTTGGGTCT | p.D101_F102insLGL | -                                   | B | 0    | 627   | 16  | 592  |
| A024CBT | TE | FLT3   | NM_004119    | 9  | c.C1197A              | p.N399K           | -                                   | C | 49   | 406   | 55  | 242  |
| A024CBT | TE | RUNX1  | NM_001754    | 9  | c.1036delC            | p.R346Afs*247     | -                                   | A | 0    | 721   | 19  | 711  |
| A024CBT | TE | TET2   | NM_001127208 | 4  | c.A3467T              | p.N1156I          | -                                   | B | 6    | 420   | 2   | 401  |
| R025CJC | PV | JAK2   | NM_004972    | 14 | c.G1849T              | p.V617F           | COSM12600                           | A | 39   | 1366  | 0   | 796  |
| R025CJC | PV | DNMT3A | NM_022552    | 23 | c.C2644T              | p.R882C           | COSM53042;COSM1166704               | A | 23   | 860   | 23  | 405  |
| R025CJC | PV | NF1    | NM_001042492 | 40 | c.C5902T              | p.R1968X          | COSM3402748;COSM30766               | A | 3    | 949   | 0   | 185  |
| R025CJC | PV | TP53   | NM_000546    | 7  | c.G743A               | p.R248Q           | COSM99602;COSM99021;COSM99020       | A | 0    | 1167  | 87  | 672  |
| A028CBG | PV | JAK2   | NM_004972    | 14 | c.G1849T              | p.V617F           | COSM12600                           | A | 47   | 591   | 47  | 561  |
| A028CBG | PV | DNMT3A | NM_022552    | 23 | c.C2701G              | p.L901V           | -                                   | B | 41   | 297   | 43  | 284  |
| A028CBG | PV | DNMT3A | NM_022552    | 15 | c.G1685A              | p.C562Y           | COSM249136;COSM5878817              | A | 51   | 370   | 39  | 268  |
| A028CBG | PV | IDH2   | NM_002168    | 4  | c.G419A               | p.R140Q           | COSM41590                           | A | 48   | 408   | 50  | 458  |
| A028CBG | PV | MPL    | NM_005373    | 12 | c.G1775A              | p.R592Q           | COSM2170465                         | A | 0    | 456   | 42  | 434  |
| A028CBG | PV | SUZ12  | NM_015355    | 16 | c.G2016A              | p.M672I           | -                                   | C | 49   | 629   | 52  | 511  |

|         |    |       |              |    |                         |                             |                                                 |   |     |       |     |      |
|---------|----|-------|--------------|----|-------------------------|-----------------------------|-------------------------------------------------|---|-----|-------|-----|------|
| A028CBG | PV | U2AF1 | NM_006758    | 6  | c.A470C                 | p.Q157P                     | COSM211534;COSM1318797                          | A | 0   | 897   | 5   | 900  |
| A029CCM | PV | JAK2  | NM_004972    | 14 | c.G1849T                | p.V617F                     | COSM12600                                       | A | 10  | 1894  | 1.6 | 818  |
| A029CCM | PV | TP53  | NM_000546    | 7  | c.G734A                 | p.G245D                     | COSM3388189                                     | B | 3   | 1464  | 45  | 882  |
| A030CMM | TE | CALR  | NM_004343    | 9  | c.1154_1155insT<br>TGTC | p.K385fs                    | COSM1738056                                     | A | 57  | 1415  | 37  | 881  |
| A030CMM | TE | ATM   | NM_000051    | 34 | c.A5071C                | p.S1691R                    | COSM6005491<br>COSM5611197;COSM5611198;COSM2196 | C | 44  | 424   | 47  | 358  |
| A030CMM | TE | WT1   | NM_024426    | 2  | c.C745T                 | p.P249S                     | 3                                               | C | 40  | 932   | 43  | 684  |
| A030CMM | TE | ATM   | NM_000051    | 61 | c.G8845A                | p.V2949I<br>p.603insFDFREYE | -                                               | B | 14  | 4032  | 1.3 | 1306 |
| A030CMM | TE | FLT3  | NM_004119    | 14 | c.1808_1819dup          | YDLK                        | -                                               | A | 0   | 1162  | 41  | 1570 |
| A030CMM | TE | RUNX1 | NM_001754    | 6  | c.A580G                 | p.K194E                     | -                                               | B | 0.3 | 3107  | 36  | 2518 |
| B031CDM | PV | JAK2  | NM_004972    | 14 | c.G1849T                | p.V617F                     | COSM12600                                       | A | 68  | 868   | 57  | 976  |
| B031CDM | PV | DOT1L | NM_032482    | 24 | c.C3271T                | p.R1091X                    | -                                               | A | 0   | 450   | 47  | 437  |
| B031CDM | PV | RUNX1 | NM_001754    | 5  | c.A484G                 | p.R162G                     | COSM4385181;COSM24718                           | A | 0   | 491   | 57  | 825  |
| B032CFJ | TE | CALR  | NM_004343    | 9  | c.1154_1155insT<br>TGTC | p.K385fs                    | COSM1738056                                     | A | 55  | 183   | 54  | 356  |
| B032CFJ | TE | ASXL1 | NM_015338    | 12 | c.1927dupG              | p.G646Wfs*10                | COSM1411076                                     | A | 9   | 179   | 19  | 260  |
| B032CFJ | TE | PDS5B | NM_015032    | 30 | c.A3488G                | p.N1163S                    | -                                               | B | 50  | 940   | 49  | 726  |
| B032CFJ | TE | SUZ12 | NM_015355    | 15 | c.A1814T                | p.D605V                     | COSM4745721                                     | B | 0.4 | 484   | 86  | 84   |
| B032CFJ | TE | NRAS  | NM_002524    | 2  | c.G35A                  | p.G12D                      | COSM564                                         | A | 0   | 870   | 46  | 804  |
| B033CCY | PV | JAK2  | NM_004972    | 14 | c.G1849T                | p.V617F                     | COSM12600                                       | A | 31  | 1422  | 11  | 926  |
| B033CCY | PV | U2AF1 | NM_006758    | 6  | c.A470G                 | p.Q157R                     | COSM1724986;COSM211532                          | A | 26  | 11502 | 31  | 2157 |
| B033CCY | PV | GATA2 | NM_001145661 | 4  | c.635_636insTCA<br>A    | p.K212Nfs*70                | -                                               | A | 0   | 3689  | 11  | 1426 |
| B033CCY | PV | RUNX1 | NM_001754    | 5  | c.459_460insAC          | p.Q154Tfs*22                | -                                               | A | 0   | 2299  | 30  | 1186 |
| B033CCY | PV | MPL   | NM_005373    | 12 | c.1844delC              | p.C616Afs*13                | -                                               | A | 0   | 3025  | 31  | 1607 |
| B033CCY | PV | TET2  | NM_001127208 | 8  | c.G4021C                | p.A1341P                    | -                                               | B | 0   | 2829  | 30  | 480  |
| A034CSP | TE | JAK2  | NM_004972    | 14 | c.G1849T                | p.V617F                     | COSM12600                                       | A | NA  | NA    | 42  | 557  |
| A034CSP | TE | TP53  | NM_000546    | 5  | c.A536G                 | p.H179R                     | COSM1645241                                     | A | NA  | NA    | 93  | 638  |
| A034CSP | TE | ETV6  | NM_001987    | 5  | c.T602C                 | p.L201P                     | -                                               | C | NA  | NA    | 56  | 197  |
| A035CMM | PV | JAK2  | NM_004972    | 14 | c.G1849T                | p.V617F                     | COSM12600                                       | A | NA  | NA    | 73  | 603  |

|         |    |        |           |    |                     |                    |                                    |   |    |    |     |      |
|---------|----|--------|-----------|----|---------------------|--------------------|------------------------------------|---|----|----|-----|------|
| A035CMM | PV | TP53   | NM_000546 | 5  | c.T487C             | p.Y163H            | COSM1522497                        | A | NA | NA | 6   | 298  |
| A036CJA | PV | TP53   | NM_000546 | 6  | c.A659G             | p.Y220C            | COSM10758                          | A | NA | NA | 49  | 614  |
| A036CJA | PV | SH2B3  | NM_005475 | 2  | c.A197G             | p.Q66R             | -                                  | C | NA | NA | 45  | 143  |
| A036CJA | PV | SETBP1 | NM_015559 | 4  | c.A2738C            | p.N913T            | -                                  | C | NA | NA | 28  | 393  |
| A036CJA | PV | DNMT3A | NM_022552 | 19 | c.2307_2315del      | p.769_772del       | -                                  | B | NA | NA | 10  | 1311 |
| L037CRP | PV | JAK2   | NM_004972 | 14 | c.G1849T            | p.V617F            | COSM12600                          | A | NA | NA | 76  | 683  |
| L037CRP | PV | RUNX1  | NM_001754 | 6  | c.A593G             | p.D198G            | COSM4816274;COSM24799              | A | NA | NA | 35  | 920  |
| L037CRP | PV | RUNX1  | NM_001754 | 5  | c.G493T             | p.G165C            | COSM5030995;COSM96547              | A | NA | NA | 35  | 516  |
| L037CRP | PV | SRSF2  | NM_003016 | 1  | c.C284T             | p.P95L             | COSM146288;COSM211506;COSM211028   | A | NA | NA | 22  | 103  |
| L037CRP | PV | TP53   | NM_000546 | 5  | c.460_461insTCC     | p.G154delinsVR     | -                                  | A | NA | NA | 2   | 508  |
| L037CRP | PV | HMGA2  | NM_003484 | 4  | c.A307G             | p.K103E            | -                                  | C | NA | NA | 48  | 943  |
| L037CRP | PV | DOT1L  | NM_032482 | 13 | c.C1058G            | p.A353G            | -                                  | C | NA | NA | 52  | 190  |
| B038CLL | PV | NRAS   | NM_002524 | 2  | c.G37C              | p.G13R             | COSM569                            | A | NA | NA | 49  | 591  |
| B038CLL | PV | RUNX1  | NM_001754 | 4  | c.C332A             | p.T111N            | COSM42101                          | A | NA | NA | 44  | 318  |
| B038CLL | PV | TP53   | NM_000546 | 7  | c.C742T             | p.R248W            | 1                                  | A | NA | NA | 47  | 494  |
| B038CLL | PV | TP53   | NM_000546 | 7  | c.719_781delinsTC   | p.(Ser240Ilefs*85) | COSM3356966;COSM984905;COSM984907  | A | NA | NA | 29  | 623  |
| B039CLJ | PV | JAK2   | NM_004972 | 14 | c.G1849T            | p.V617F            | COSM12600                          | A | NA | NA | 11  | 526  |
| B039CLJ | PV | IDH2   | NM_002168 | 4  | c.G419A             | p.R140Q            | COSM41590                          | A | NA | NA | 2,5 | 2655 |
| B039CLJ | PV | TP53   | NM_000546 | 6  | c.A641G             | p.H214R            | COSM307281;COSM3388198;COSM1640840 | A | NA | NA | 16  | 3420 |
| B039CLJ | PV | TP53   | NM_000546 | 5  | c.384_385del        | p.A129Pfs*18       | -                                  | A | NA | NA | 40  | 676  |
| B040CPJ | TE | CALR   | NM_004343 | 9  | c.1154_1155insTTGTC | p.K385Nfs*46       | COSM1738056                        | A | NA | NA | 44  | 288  |
| B040CPJ | TE | ASXL1  | NM_015338 | 12 | c.2672dupT          | p.S892Ffs*1        | -                                  | A | NA | NA | 39  | 293  |
| B040CPJ | TE | GATA2  | NM_032638 | 6  | c.C1186T            | p.R396W            | -                                  | A | NA | NA | 7   | 1520 |
| B040CPJ | TE | NRAS   | NM_002524 | 2  | c.G38A              | p.G13D             | COSM573                            | A | NA | NA | 38  | 1096 |
| B041CRM | TE | JAK2   | NM_004972 | 14 | c.G1849T            | p.V617F            | COSM12600                          | A | NA | NA | 55  | 790  |
| B041CRM | TE | CEBPA  | NM_004364 | 1  | c.G866A             | p.R289H            | -                                  | B | NA | NA | 29  | 906  |
| B041CRM | TE | CEBPA  | NM_004364 | 1  | c.541_542insCCTT    | p.Y181Sfs*140      | -                                  | A | NA | NA | 26  | 174  |

|         |    |        |              |    |                         |              |                                                  |   |    |    |    |      |
|---------|----|--------|--------------|----|-------------------------|--------------|--------------------------------------------------|---|----|----|----|------|
| B041CRM | TE | RUNX1  | NM_001754    | 5  | c.460_462del            | p.Q154del    | -                                                | B | NA | NA | 32 | 638  |
| B041CRM | TE | TET2   | NM_001127208 | 9  | c.C4100G                | p.P1367R     | COSM4170044                                      | B | NA | NA | 41 | 193  |
| B041CRM | TE | TET2   | NM_001127208 | 11 | c.G5644C                | p.A1882P     | COSM87185                                        | A | NA | NA | 28 | 749  |
| B041CRM | TE | TET2   | NM_001127208 | 3  | c.1643dupA              | p.T549Nfs*17 | -                                                | A | NA | NA | 7  | 515  |
| A042CGJ | TE | JAK2   | NM_004972    | 14 | c.G1849T                | p.V617F      | COSM12600                                        | A | NA | NA | 14 | 561  |
| A042CGJ | TE | TP53   | NM_000546    | 5  | c.T487C                 | p.Y163H      | COSM1522497                                      | A | NA | NA | 48 | 170  |
| A042CGJ | TE | DNMT3A | NM_022552    | 23 | c.G2645A                | p.R882H      | COSM442676                                       | A | NA | NA | 22 | 176  |
| A043CBM | PV | ATRX   | NM_000489    | 9  | c.T3364A                | p.C1122S     | -                                                | C | NA | NA | 99 | 413  |
| A043CBM | PV | BCORL1 | NM_021946    | 3  | c.A3158G                | p.K1053R     | -                                                | B | NA | NA | 99 | 373  |
| A043CBM | PV | TP53   | NM_000546    | 8  | c.G841A                 | p.D281N      | COSM3932743;COSM43596;COSM164934<br>1;COSM146336 | A | NA | NA | 90 | 1049 |
| A043CBM | PV | ATM    | NM_000051    | 8  | c.C998T                 | p.S333F      | COSM5020962;COSM5020963                          | B | NA | NA | 52 | 509  |
| A044CMM | PV | ASXL1  | NM_015338    | 12 | c.2894_2896del          | p.965_966del | -                                                | B | NA | NA | 41 | 664  |
| A044CMM | PV | DNMT3A | NM_022552    | 23 | c.G2645A                | p.R882H      | COSM52944;COSM442676                             | A | NA | NA | 43 | 419  |
| A044CMM | PV | NF1    | NM_001042492 | 4  | c.T7010C                | p.L2337P     | -                                                | B | NA | NA | 29 | 70   |
| A044CMM | PV | SH2B3  | NM_005475    | 8  | c.C1696T                | p.R566W      | -                                                | B | NA | NA | 39 | 217  |
| A044CMM | PV | TET2   | NM_001127208 | 3  | c.A1355C                | p.E452A      | -                                                | B | NA | NA | 48 | 456  |
| A044CMM | PV | TP53   | NM_000546    | 10 | c.C1009T                | p.R337C      | COSM117591;COSM11071                             | A | NA | NA | 47 | 695  |
| A045CVB | TE | JAK2   | NM_004972    | 14 | c.G1849T                | p.V617F      | COSM12600                                        | A | NA | NA | 58 | 848  |
| A045CVB | TE | EZH2   | NM_004456    | 8  | c.G857A                 | p.C286Y      | -                                                | B | NA | NA | 46 | 972  |
| A045CVB | TE | NF1    | NM_001042492 | 37 | c.A5039G                | p.Y1680C     | -                                                | B | NA | NA | 45 | 464  |
| A046CBN | TE | CALR   | NM_004343    | 9  | c.1154_1155insT<br>TGTC | p.K385Nfs*46 | COSM1738056                                      | A | NA | NA | 48 | 311  |
| A046CBN | TE | CUX1   | NM_001202543 | 18 | c.G2206A                | p.D736N      | -                                                | C | NA | NA | 45 | 110  |
| A047CRG | PV | JAK2   | NM_004972    | 14 | c.G1849T                | p.V617F      | COSM12600                                        | A | NA | NA | 5  | 489  |
| A047CRG | PV | BCORL1 | NM_021946    | 3  | c.A1003C                | p.T335P      | -                                                | B | NA | NA | 23 | 266  |
| A047CRG | PV | BCORL1 | NM_021946    | 3  | c.C2752T                | p.Q918X      | -                                                | A | NA | NA | 6  | 463  |
| A047CRG | PV | BCORL1 | NM_021946    | 6  | c.G3969C                | p.E1323D     | -                                                | B | NA | NA | 44 | 50   |
| A047CRG | PV | CHEK2  | NM_001005735 | 5  | c.720delA               | p.V241Ffs*6  | -                                                | A | NA | NA | 46 | 164  |
| A047CRG | PV | CUX1   | NM_001202543 | 18 | c.G2206A                | p.D736N      | -                                                | C | NA | NA | 56 | 143  |

|         |    |        |              |    |                |               |                                  |   |   |    |     |    |      |
|---------|----|--------|--------------|----|----------------|---------------|----------------------------------|---|---|----|-----|----|------|
| A048CBA | PV | TP53   | NM_000546    | 5  | c.A395G        | p.K132R       | COSM3388223;COSM1646844;COSM1158 | 2 | A | NA | NA  | 94 | 50   |
| A049CBE | TE | ASXL1  | NM_015338    | 12 | c.1927dupG     | p.G646Wfs*10  | COSM4170082;COSM1411076          | - | A | 1  | 392 | 26 | 164  |
| A049CBE | TE | CHEK2  | NM_001005735 | 16 | c.1696delC     | p.R566Vfs*41  | -                                | - | A | 7  | 171 | 0  | 680  |
| A049CBE | TE | PPMD1  | NM_003620    | 6  | c.1427delA     | p.N477ifs*5   | -                                | - | A | 7  | 801 | 0  | 460  |
| A049CBE | TE | TP53   | NM_000546    | 7  | c.G734A        | p.G245D       | COSM3388189;COSM43606;COSM179807 | - | A | 4  | 540 | 3  | 72   |
| A049CBE | TE | SH2B3  | NM_005475    | 7  | c.C1298T       | p.S433L       | -                                | - | B | 93 | 212 | 40 | 126  |
| A049CBE | TE | TP53   | NM_000546    | 7  | c.C742T        | p.R248W       | COSM120006;COSM120005            | - | A | 2  | 456 | 89 | 56   |
| P050CGR | TE | CALR   | NM_004343    | 9  | c.1092_1143del | p.Glu364fs    | COSM1738057                      | - | A | NA | NA  | 16 | 64   |
| P050CGR | TE | ASXL1  | NM_015338    | 12 | c.3150dupG     | p.R1051Afs*35 | -                                | - | A | NA | NA  | 37 | 633  |
| P050CGR | TE | NRAS   | NM_002524    | 2  | c.G35T         | p.G12V        | COSM566                          | - | A | NA | NA  | 5  | 967  |
| P050CGR | TE | PDS5B  | NM_015032    | 12 | c.G1355A       | p.R452Q       | -                                | - | B | NA | NA  | 28 | 334  |
| P050CGR | TE | SETBP1 | NM_015559    | 4  | c.G1933A       | p.E645K       | -                                | - | B | NA | NA  | 46 | 1334 |
| P050CGR | TE | SUZ12  | NM_015355    | 15 | c.T1808G       | p.F603C       | -                                | - | B | NA | NA  | 44 | 296  |
| P051CLO | TE | MPL    | NM_005373    | 10 | c.G1544T       | p.W515L       | COSM3719407;COSM18918            | - | A | 6  | 128 | 16 | 307  |
| P051CLO | TE | IDH2   | NM_002168    | 4  | c.G419A        | p.R140Q       | COSM41590                        | - | A | 15 | 492 | 2  | 431  |
| P051CLO | TE | SRSF2  | NM_003016    | 1  | c.C284G        | p.P95R        | COSM211661;COSM4385016           | - | A | 28 | 241 | 46 | 442  |
| P051CLO | TE | TP53   | NM_000546    | 7  | c.A736G        | p.M246V       | COSM251431;COSM251429;COSM172638 | 2 | A | 0  | 677 | 18 | 1061 |
| A053CFJ | PV | TP53   | NM_000546    | 7  | c.G743A        | p.R248Q       | COSM99602;COSM99021;COSM99020    | - | A | NA | NA  | 69 | 503  |
| P054CRP | TE | JAK2   | NM_004972    | 14 | c.G1849T       | p.V617F       | COSM12600                        | - | A | NA | NA  | 50 | 828  |
| P054CRP | TE | SUZ12  | NM_015355    | 9  | c.A1009G       | p.I337V       | -                                | - | B | NA | NA  | 30 | 503  |
| P054CRP | TE | TET2   | NM_001127208 | 3  | c.2064delT     | p.S689Pfs*10  | -                                | - | A | NA | NA  | 49 | 471  |
| P054CRP | TE | TET2   | NM_001127208 | 3  | c.3348dupA     | p.N1118Kfs*10 | COSM4613615;COSM4613616          | - | A | NA | NA  | 53 | 341  |
| P054CRP | TE | U2AF1  | NM_006758    | 2  | c.C101A        | p.S34Y        | COSM1190367;COSM146287           | - | A | NA | NA  | 46 | 347  |
